# Supplementary material for: Endocrine system after 2 years of COVID-19 vaccines: A narrative review of the literature
Source: PubMed Central journal article supplement (PMC9685624; doi:10.3389/fendo.2022.1027047), 2022-11-10
Supplement: Table_1.pdf [file Table_1.pdf]

**Supplementary Table 1. Case reports concerning endocrine adverse effects after COVID-19 vaccine.**

| <i>Subacute Thyroiditis</i>   |              |                                                                                                                                                                                                                           |                                                              |                                                  |                                                                                                                                                                                                                        |                                                                                                                                          |                                                                                                                                                                                                                                                                                                  |
|-------------------------------|--------------|---------------------------------------------------------------------------------------------------------------------------------------------------------------------------------------------------------------------------|--------------------------------------------------------------|--------------------------------------------------|------------------------------------------------------------------------------------------------------------------------------------------------------------------------------------------------------------------------|------------------------------------------------------------------------------------------------------------------------------------------|--------------------------------------------------------------------------------------------------------------------------------------------------------------------------------------------------------------------------------------------------------------------------------------------------|
| Author, year                  | Study design | Patient(s)                                                                                                                                                                                                                | Type of vaccine                                              | Latency between vaccine and symptoms             | Clinical presentation                                                                                                                                                                                                  | Treatment                                                                                                                                | Outcome/Conclusions                                                                                                                                                                                                                                                                              |
| Iremli et al, 2021(1)         | Case series  | W, 35 years, no medical history<br>W, 34 years, mild COVID infection 5 months prior<br>W, 37 years, no medical history                                                                                                    | Sinovac Biotech<br>Coronavac<br>Sinovac Biotech<br>Coronavac | 4 days after 2nd dose<br>4 days after 1st dose   | Anterior cervical pain, fever, palpitations and fatigue<br>Anterior cervical pain, fever, fatigue and palpitations                                                                                                     | Methylprednisolone and propranolol<br>Methylprednisolone 16 mg/day and propranolol 25 mg/12h                                             | Neck pain and palpitation complaints disappeared within a day, TFTs were normalized within 4 weeks<br>Myalgia and neck pain reappeared during methylprednisolone tapering; complaints disappeared after 8 weeks<br>Neck pain disappeared and TFTs were normalized within 8 weeks                 |
| Franquemont et al, 2021(2)    | Case report  | W, 42 years, no medical history                                                                                                                                                                                           | Pfizer/BioNtech<br>BNT 16b2                                  | 5 days after 1st dose                            | Anterior cervical pain and palpitations                                                                                                                                                                                | Prednisone 40 mg/day and propranolol 20 mg as needed for symptoms                                                                        | Rapid improvements of symptoms, after 1 month; TFTs suggested subclinical hyperthyroidism                                                                                                                                                                                                        |
| Pujol et al, 2021(3)          | Case series  | W, 38 years, Asthma and Gilbert disease                                                                                                                                                                                   | Moderna mRNA-1273                                            | 8 days after 1st dose                            | Anterior cervical pain, palpitations, distal tremor, axillar and inguinal bilateral ganglionic reaction                                                                                                                | Prednisone, propranolol and Ibuprofen                                                                                                    | Improvements of symptoms within a week, TFTs were normalized                                                                                                                                                                                                                                     |
| Saygili et al, 2021(4)        | Case report  | W, 32 years, type 1 diabetes                                                                                                                                                                                              | Pfizer/BioNtech<br>BNT 16b2                                  | 10 days after 1st dose                           | Palpitations and insomnia                                                                                                                                                                                              | No treatment                                                                                                                             | Overt hypothyroidism 8 weeks later, treatment with levothyroxine was started.                                                                                                                                                                                                                    |
| Sahin Tekin et al, 2021(5)    | Case report  | W, 38 years, no medical history                                                                                                                                                                                           | Sinovac Biotech<br>Coronavac                                 | 14 days after 2nd dose                           | Neck swelling, pain, fatigue, loss of appetite and sweating                                                                                                                                                            | Naproxen sodium 275 mg/12h and propranolol 20 mg/12 h                                                                                    | Improvements of symptoms, overt hypothyroidism 1 month later, treatment with levothyroxine was started                                                                                                                                                                                           |
| Bornemann et al, 2021(6)      | Case report  | M, 67 years, hypertension and atrial extrabeats                                                                                                                                                                           | Sinovac Biotech<br>Coronavac                                 | 18 days after 2nd dose                           | Fever, weight loss and neck and ear pain                                                                                                                                                                               | Ibuprofen 800 mg/day                                                                                                                     | Neck pain intermittently continued for a while, TFTs were normalized within 2 months                                                                                                                                                                                                             |
| Plaza-Enriquez et al, 2021(7) | Case series  | W, 26 years, no medical history<br>W, 49 years, no medical history                                                                                                                                                        | Vaxzevria<br>ChAdOx1<br>Moderna mRNA-1273                    | 14 days after 1st dose<br>14 days after 1st dose | Cervical pain radiated to both ears<br>Headaches and difficulty in concentrating, then a right cervical sore throat                                                                                                    | Ibuprofen 600 mg/day, then prednisolone 50 mg/day<br>Ibuprofen 600 mg/day, then diclofenac 50 mg/day due to gastrointestinal intolerance | Improvements of symptoms within 2 weeks, TFTs were normalized within 6 weeks<br>Improvements of symptoms within 2 weeks, the patient discontinued the treatment and displayed thyrotoxicosis with positive anti-TPO after 4 weeks; symptoms improved after treatment with prednisolone 20 mg/day |
| Plaza-Enriquez et al, 2021(7) | Case report  | W, 42 years, right hemicolectomy for adenocarcinoma of colon followed by adjuvant chemotherapy, paroxysmal supraventricular tachycardia, iron deficiency anemia, chemotherapy-induced neuropathy and lumbar radiculopathy | Moderna mRNA-1273                                            | 5-6 days after 2nd dose                          | Bilateral earache radiating down to the lateral and anterior neck and bilateral lower jaw, fever, fatigue, malaise, anorexia, myalgia, dysphagia, dysphonia, dyspnea cough, rhinorrhea, lacrimation, and ear discharge | NSAIDs                                                                                                                                   | Cervical pain and TFTs were improved within 2 months                                                                                                                                                                                                                                             |

|                             |             |                                                                                                         |                          |                            |                                                                                              |                                                                        |                                                                                                                                   |
|-----------------------------|-------------|---------------------------------------------------------------------------------------------------------|--------------------------|----------------------------|----------------------------------------------------------------------------------------------|------------------------------------------------------------------------|-----------------------------------------------------------------------------------------------------------------------------------|
| Siolos et al, 2021(8)       | Case report | W, 51 years, no medical history                                                                         | Pfizer/BioNtech BNT 16b2 | 14 days after 1st dose     | Nausea, mild anterior neck pain, and fever up to 38.2°C                                      | Methylprednisolone 16 mg/day                                           | Symptoms and TFTs were improved within 2 months                                                                                   |
| Schimmel et al, 2021(9)     | Case report | W, 39 years, no medical history                                                                         | Vaxzevria ChAdOx1        | 21 days after unknown dose | NA                                                                                           | No treatment                                                           | TFTs were improved within 2 months                                                                                                |
| Oyibo, 2021(10)             | Case report | W, 57 years, no medical history                                                                         | Pfizer/BioNtech BNT 16b2 | 1 day after 2nd dose       | Cervical pain and swelling                                                                   | Ibuprofen and propranolol                                              | NA                                                                                                                                |
| Ratnayake et al, 2021(11)   | Case report | W, 55 years, well controlled asthma                                                                     | Vaxzevria ChAdOx1        | 21 days after 1st dose     | Cervical pain and swelling, sore throat, headache, palpitations                              | NSAIDs, paracetamol and propranolol                                    | Overt hypothyroidism 6 weeks later, treatment with levothyroxine 50 mcg/daily was started                                         |
| Chatzi et al, 2021(12)      | Case report | M, 75 years, no medical history                                                                         | Vaxzevria ChAdOx1        | 14 days after 1st dose     | Cervical pain and fever                                                                      | Ibuprofen                                                              | Symptoms gradually resolved, TFTs were normalized within 1 month                                                                  |
| Jeeyavudeen et al, 2021(13) | Case report | W, 35 years, no medical history                                                                         | Pfizer/BioNtech BNT 16b2 | 12 days after 1st dose     | Cervical pain radiated to jaw and ear, fatigue, palpitations                                 | Prednisolone                                                           | NA                                                                                                                                |
| Kyriacou et al, 2021(14)    | Case report | W, 32 years, no medical history                                                                         | Pfizer/BioNtech BNT 16b2 | 4 days after 2nd dose      | Cervical pain, fatigue                                                                       | Prednisolone                                                           | NA                                                                                                                                |
| Soltanpoor et al, 2021(15)  | Case report | W, mid age, no medical history                                                                          | Pfizer/BioNtech BNT 16b2 | 14 days after 2nd dose     | Thyroid painful swelling, poor sleep, night sweats, weight loss, hyperdefaecation            | NSAIDs                                                                 | Symptoms disappeared within 6 weeks, TFTs were normalized within 8 weeks                                                          |
| Lee et al, 2021(16)         | Case report | W, 40 years, NA medical history                                                                         | Pfizer/BioNtech BNT 16b2 | 12 hours after 2nd dose    | Anterior cervical pain, malaise, bony aches, emotional lability, hyperhidrosis, palpitations | Prednisolone 40mg/day, propranolol                                     | Symptoms disappeared after 24-48 hours, TFTs were normalized within a month                                                       |
| Khan et al, 2021(17)        | Case report | W, 34 years, no medical history                                                                         | Bharat Biotech BBV512    | 5-7 days after 1st dose    | Mild fever, palpitation, anterior cervical pain                                              | Prednisolone 15 mg/day and propranolol 20 mg/12 h                      | Symptoms disappeared within 2 weeks, TFTs were normalized within 7 weeks                                                          |
| Leber et al, 2021(18)       | Case report | W, 39 years, NA medical history                                                                         | Vaxzevria ChAdOx1        | 4 days after 2nd dose      | Cervical pain                                                                                | NA                                                                     | NA                                                                                                                                |
| Sözen et al, 2021(19)       | Case report | W, 73 years, NA medical history                                                                         | Vaxzevria ChAdOx1        | 11 days after 1st dose     | Cervical pain and fever                                                                      | NA                                                                     | NA                                                                                                                                |
| Leber et al, 2021(18)       | Case report | W, 42 years, asymptomatic COVID-19 infection 3 months prior                                             | Pfizer/BioNtech BNT 16b2 | 4 days after 2nd dose      | Palpitations, fever and left cervical pain                                                   | Prednisolone 30 mg/day, propranolol 80 mg/day and ibuprofen 400 mg/8 h | Symptoms improved in few days, TFTs were normalized within 4 weeks                                                                |
| Sözen et al, 2021(19)       | Case series | W, 32 years, NA medical history                                                                         | Sinovac Coronavac        | 12 hours after 2nd dose    | Low visual acuity and pain on movement of the left eye and headache                          | Methylprednisolone 1 g intravenously for 6 days                        | Symptoms improved and TFTs normalized 3 days after discharge                                                                      |
|                             |             | M, 41 years, no medical history                                                                         | Pfizer/BioNtech BNT 16b2 | 8 days after 1st dose      | Cervical pain, palpitation, fatigue                                                          | Acetylsalicylic acid 500 mg/6 h and propranolol 20 mg/12 h             | Symptoms improved within few weeks, overt hypothyroidism, which improved over the next several months                             |
|                             |             | W, 40 years, no medical history                                                                         | Pfizer/BioNtech BNT 16b2 | 6 days after 2nd dose      | Cervical pain, palpitation, sweating                                                         | Acetylsalicylic acid 500 mg/6 h and propranolol 20 mg/12 h             | Symptoms improved within 2 weeks, TFTs were normalized within 1 month                                                             |
|                             |             | M, 40 years, smoker for 15 years                                                                        | Pfizer/BioNtech BNT 16b2 | 4 days after 1st dose      | Cervical pain, fatigue, nervousness                                                          | Ibuprofen 600 mg/8 h                                                   | NA                                                                                                                                |
|                             |             | W, 26 years, no medical history                                                                         | Pfizer/BioNtech BNT 16b2 | 6 days after 1st dose      | Cervical pain                                                                                | Acetylsalicylic acid 500 mg/6 h and propranolol 20 mg/12 h             | Symptoms improved within 2 weeks, called for outpatient follow-up 1 month later in terms of the risk of developing hypothyroidism |
|                             |             | W, 44 years, Hashimoto's thyroiditis and hypothyroidism well controlled with levothyroxine 50 mcg/daily | Pfizer/BioNtech BNT 16b2 | 6 days after 1st dose      | Cervical pain, headache, palpitation, sweating and tremor                                    | Ibuprofen 600 mg/8 h                                                   | Symptoms improved within the next weeks, TFTs were normalized within the next weeks                                               |

|                                |             |                                                                                                                                                                                                                                                                                                                                                                                                                                                                |                                                                                                                                                                                                                                                                                                                          |                                                                                                                                                                                                                                                                                            |                                                                                                                                                                                                                                                                                                                                                                                                                                                                      |                                                                                                                                                                                                             |                                                                                                                                                                                                                                                                                                                                                                                                                                                                                                                                                                                                                                                                                    |
|--------------------------------|-------------|----------------------------------------------------------------------------------------------------------------------------------------------------------------------------------------------------------------------------------------------------------------------------------------------------------------------------------------------------------------------------------------------------------------------------------------------------------------|--------------------------------------------------------------------------------------------------------------------------------------------------------------------------------------------------------------------------------------------------------------------------------------------------------------------------|--------------------------------------------------------------------------------------------------------------------------------------------------------------------------------------------------------------------------------------------------------------------------------------------|----------------------------------------------------------------------------------------------------------------------------------------------------------------------------------------------------------------------------------------------------------------------------------------------------------------------------------------------------------------------------------------------------------------------------------------------------------------------|-------------------------------------------------------------------------------------------------------------------------------------------------------------------------------------------------------------|------------------------------------------------------------------------------------------------------------------------------------------------------------------------------------------------------------------------------------------------------------------------------------------------------------------------------------------------------------------------------------------------------------------------------------------------------------------------------------------------------------------------------------------------------------------------------------------------------------------------------------------------------------------------------------|
| Pandya et al, 2021(20)         | Case series | M, 37 years, prediabetes and dyslipidemia<br>M, 35 years, no medical history                                                                                                                                                                                                                                                                                                                                                                                   | Moderna mRNA-1273<br>Pfizer/BioNtech BNT 16b2                                                                                                                                                                                                                                                                            | 15 days after 1st dose<br>10 days after 1st dose                                                                                                                                                                                                                                           | Fever, cervical pain, tachycardia, palpitations, proptosis<br>Cervical pain, palpitations                                                                                                                                                                                                                                                                                                                                                                            | Propranolol, ibuprofen and then prednisone<br>Propranolol and ibuprofen                                                                                                                                     | Symptoms improved after prednisone was started<br>Symptoms disappeared in few days, TFTs improved within 2 weeks                                                                                                                                                                                                                                                                                                                                                                                                                                                                                                                                                                   |
| Sigstad et al, 2021(21)        | Case report | W, 41 years, no medical history                                                                                                                                                                                                                                                                                                                                                                                                                                | Pfizer/BioNtech BNT 16b2                                                                                                                                                                                                                                                                                                 | 20 days after 2nd dose<br>6 days after 1st dose                                                                                                                                                                                                                                            | Tachycardia, palpitations<br>Feeling a lump on throat                                                                                                                                                                                                                                                                                                                                                                                                                | Diltiazem and ibuprofen<br>No treatment for SAT                                                                                                                                                             | NA<br>Hemithyroidectomy followed by complementary hemithyroidectomy, and then radioactive iodine therapy                                                                                                                                                                                                                                                                                                                                                                                                                                                                                                                                                                           |
| González López et al, 2021(22) | Case series | W, 32 years, no medical history                                                                                                                                                                                                                                                                                                                                                                                                                                | Pfizer/BioNtech BNT 16b2                                                                                                                                                                                                                                                                                                 | 3 days after 2nd dose                                                                                                                                                                                                                                                                      | Cervical pain, fever, fatigue                                                                                                                                                                                                                                                                                                                                                                                                                                        | Naproxen                                                                                                                                                                                                    | TFTs were normalized within 4 weeks                                                                                                                                                                                                                                                                                                                                                                                                                                                                                                                                                                                                                                                |
| Rebollar, 2021(23)             | Case report | W, 53 years, no medical history                                                                                                                                                                                                                                                                                                                                                                                                                                | Vaxzevria ChAdOx1                                                                                                                                                                                                                                                                                                        | 1 day after 1st dose                                                                                                                                                                                                                                                                       | Cervical pain radiated to ear, fever, fatigue, tachycardia, weight loss                                                                                                                                                                                                                                                                                                                                                                                              | Ibuprofen and propranolol                                                                                                                                                                                   | Asymptomatic overt hypothyroidism after 2 months                                                                                                                                                                                                                                                                                                                                                                                                                                                                                                                                                                                                                                   |
| Ippolito et al, 2022(24)       | Case series | W, 33 years, no medical history<br>W, 53 years, no medical history<br>W, 41 years, no medical history                                                                                                                                                                                                                                                                                                                                                          | Convidecia AD5-nCOV<br>Pfizer/BioNtech BNT 16b2                                                                                                                                                                                                                                                                          | 15 days after 1st dose<br>15 days after 1st dose                                                                                                                                                                                                                                           | Malaise, asthenia, fever, arthralgia and myalgia<br>Neck pain radiating to ear and jaw, fast heartbeat, sweating                                                                                                                                                                                                                                                                                                                                                     | NSAIDs<br>Propranolol 40 mg/day and prednisone 25 mg/day tapered and discontinued after 8 weeks                                                                                                             | Symptoms improved, overt hypothyroidism after 4 weeks<br>Transient hypothyroidism not treated and spontaneously resolved                                                                                                                                                                                                                                                                                                                                                                                                                                                                                                                                                           |
| Yorulmaz et al, 2022(25)       | Case series | W, 31 years, seronegative hypothyroidism, well controlled with levothyroxine 50 mcg daily.<br>W, 64 years, no medical history<br>W, 47 years, no medical history<br>M, 67 years, no medical history<br>W, 62 years, no medical history<br>M, 44 years, no medical history<br>M, 26 years, no medical history<br>W, 37 years, previous Grave's disease<br>W, 39 years, no medical history<br>W, 40 years, no medical history<br>M, 29 years, no medical history | Pfizer/BioNtech BNT 16b2 (1st dose)<br>Vaxzevria ChAdOx1<br>Pfizer/BioNtech BNT 16b2<br>Sinovac Biotech Coronavac<br>Sinovac Biotech Coronavac<br>Pfizer/BioNtech BNT 16b2<br>Pfizer/BioNtech BNT 16b2<br>Sinovac Biotech Coronavac<br>Pfizer/BioNtech BNT 16b2<br>Pfizer/BioNtech BNT 16b2<br>Sinovac Biotech Coronavac | 28 days after 2nd dose<br>18 days after 2nd dose<br>21 days after 1st dose<br>19 days after 2nd dose<br>30 days after 2nd dose<br>15 days after 1st dose<br>37 days after 2nd dose<br>15 days after 2nd dose<br>18 days after 1st dose<br>15 days after 2nd dose<br>15 days after 3rd dose | Severe neck pain radiating to ear, fast heartbeat, sweating, headache<br>Moderate cervical pain, mild fever, fatigue, palpitations, sweating<br>Cervical pain, headache, tremors, sweating<br>Cervical pain, weight loss, fever, tachycardia<br>Cervical pain<br>Cervical pain, weight loss, fever, sweating<br>Cervical pain, weight loss, fever, tremors, myalgia<br>Cervical pain, dysphagia<br>Weight loss, tachycardia<br>Cervical pain, fever<br>Cervical pain | Prednisone 25 mg/day tapered and discontinued after 4 weeks<br>NSAIDs<br>NSAIDs and betablockers<br>NSAIDs<br>NSAIDs<br>NSAIDs<br>NSAIDs<br>NSAIDs<br>NSAIDs and betablockers<br>NSAIDs<br>NSAIDs<br>NSAIDs | Improvements of symptoms, TFTs were normalized within 4 weeks<br>Improvements of symptoms, TFTs were normalized within 1 month<br>Improvements of symptoms, TFTs were normalized within 2 months<br>Improvements of symptoms, TFTs were normalized within 2 months<br>Overt hypothyroidism, treatment with levothyroxine was started<br>Improvements of symptoms, TFTs were normalized within 1.5 months<br>Overt hypothyroidism, treatment with levothyroxine was started<br>Improvements of symptoms, TFTs were normalized within 2.5 months<br>Improvements of symptoms, TFTs were normalized within 2 months<br>Improvements of symptoms, TFTs were normalized within 2 months |

|                             |                                                                            |                           |                           |                                                                                                                                                 |                                                         |                                                                                                                                                                                                                                                                                         |
|-----------------------------|----------------------------------------------------------------------------|---------------------------|---------------------------|-------------------------------------------------------------------------------------------------------------------------------------------------|---------------------------------------------------------|-----------------------------------------------------------------------------------------------------------------------------------------------------------------------------------------------------------------------------------------------------------------------------------------|
|                             | W, 73 years, previous SAT 20 years before                                  | Sinovac Biotech Coronavac | 30 days after 2nd dose    | Cervical pain, tachycardia                                                                                                                      | NSAIDs and betablockers                                 | Overt hypothyroidism, treatment with levothyroxine was started                                                                                                                                                                                                                          |
|                             | W, 30 years, no medical history                                            | Pfizer/BioNtech BNT 16b2  | 30 days after 2nd dose    | Cervical pain                                                                                                                                   | NSAIDs                                                  | Overt hypothyroidism, treatment with levothyroxine was started                                                                                                                                                                                                                          |
| Patel et al, 2022(26)       | M, 48 years, NA medical history                                            | NA                        | 7 days after 2nd dose     | Right cervical swelling, fever, palpitations and weight loss                                                                                    | NSAIDs and prednisone 40 mg/day                         | Symptoms disappeared after 24 hours                                                                                                                                                                                                                                                     |
| Pla Peris et al, 2022(27)   | M, 57 years, NA medical history                                            | Moderna mRNA-1273         | 10-14 days after 1st dose | No neck pain, no swelling, mild fever, asthenia, weight loss, palpitation                                                                       | NSAIDs                                                  | Subclinical hypothyroidism                                                                                                                                                                                                                                                              |
|                             | M, 67 years, NA medical history                                            | Moderna mRNA-1273         | 10-14 days after 1st dose | Neck pain radiating to ears, asthenia, mild fever, tachycardia                                                                                  | NSAIDs                                                  | TFTs were normalized                                                                                                                                                                                                                                                                    |
|                             | M, 47 years, NA medical history                                            | Pfizer/BioNtech BNT 16b2  | 10-14 days after 1st dose | Neck pain radiating to ears, asthenia, mild fever, tachycardia                                                                                  | NSAIDs                                                  | Subclinical hypothyroidism                                                                                                                                                                                                                                                              |
| Bostan et al, 2022(28)      | M, 61 years, diabetes mellitus, hypertension prior to COVID-19 infection   | Sinovac Biotech Coronavac | 6 days after 1st dose     | Cervical swelling in the anterior area and pain radiating to the jaw, palpitations, fever                                                       | Ibuprofen 200 mg/day and propranolol 20 mg/12 h         | Symptoms disappeared, asymptomatic subclinical hypothyroidism within a month                                                                                                                                                                                                            |
|                             | W, 32 years, breastfeeding for 10 months                                   | Pfizer/BioNtech BNT 16b2  | 3 days after 1st dose     | Cervical pain, fever, arthralgia                                                                                                                | Methylprednisolone 16 mg/day and propranolol 20 mg/12 h | Symptoms improved and TFTs were normalized within 3 weeks                                                                                                                                                                                                                               |
| Jhon et al, 2022(29)        | M, 34 years, NA medical history                                            | Moderna mRNA-1273         | 5 days after 1st dose     | Feeling a lump when swallowing, cervical pain, weight loss, fatigue, headache, muscle weakness, tachycardia                                     | Prednisone 30 mg/day                                    | Symptoms rapidly improved, TFTs were normalized after 55 days                                                                                                                                                                                                                           |
| Vasileiou et al, 2022(30)   | W, 36 years, ulcerative gastritis, intraocular hypertension, endometriosis | Pfizer/BioNtech BNT 16b2  | 10 days after 1st dose    | Fatigue, palpitations, and cervical pain that radiated to the ear and jaw                                                                       | No treatment                                            | The 2nd dose of the vaccine was administrated 10 days later, the symptoms recurred. Treatment was done with paracetamol and ibuprofen but the symptoms were worsened and TFTs were abnormal. Treatment with methylprednisolone improved symptoms and 2 weeks later TFTs were normalized |
| Das et al, 2022(31)         | W, 47 years, NA medical history                                            | Vaxzevria ChAdOx1         | 14 days after 1st dose    | Fever, cervical pain radiated to the jaw, weight loss, difficulty in swallowing, restlessness, tachycardia                                      | Propranolol 40 mg/day                                   | Symptoms disappeared and TFTs were normalized within 8 weeks                                                                                                                                                                                                                            |
| Bahçecioglu et al, 2022(32) | W, 82 years, NA medical history                                            | Sinovac Biotech Coronavac | 14 days after 2nd dose    | Fever, tremor, weight loss                                                                                                                      | NSAIDs and $\beta$ -blockers                            | NA                                                                                                                                                                                                                                                                                      |
|                             | W, 79 years, NA medical history                                            | Sinovac Biotech Coronavac | 7 days after 2nd dose     | Fever, tremor, anorexia, asthenia, weight loss                                                                                                  | NSAIDs and $\beta$ -blockers                            | NA                                                                                                                                                                                                                                                                                      |
|                             | W, 41 years, NA medical history                                            | Pfizer/BioNtech BNT 16b2  | 28 days after 2nd dose    | Cervical pain                                                                                                                                   | NSAIDs                                                  | NA                                                                                                                                                                                                                                                                                      |
|                             | W, 28 years, NA medical history                                            | Sinovac Biotech Coronavac | 77 days after 2nd dose    | Cervical pain, weight loss                                                                                                                      | NSAIDs                                                  | NA                                                                                                                                                                                                                                                                                      |
|                             | W, 41 years, NA medical history                                            | Pfizer/BioNtech BNT 16b2  | 28 days after 2nd dose    | Cervical pain, palpitations, sweating                                                                                                           | Methylprednisolone 24 mg/day and $\beta$ -blockers      | NA                                                                                                                                                                                                                                                                                      |
|                             | M, 71 years, NA medical history                                            | Sinovac Biotech Coronavac | 84 days after 2nd dose    | Cervical pain, asthenia, weight loss                                                                                                            | Methylprednisolone 16 mg/day                            | NA                                                                                                                                                                                                                                                                                      |
| Pipitone et al, 2022(33)    | W, 49 years, nonmedical history                                            | Pfizer/BioNtechBNT 16b2   | 7 days after 1st dose     | Anterior cervical pain, anxiety, dysphagia, fatigue, increased bowel motility, insomnia, night sweat, palpitation, tachycardia, and weight loss | Prednisone, NSAIDs, and $\beta$ -blockers               | TFTs were normalized 3 weeks after discharge                                                                                                                                                                                                                                            |

|                              |                |                                                        |                                                                                                                    |                        |                                                                                             |                                                                                                               |                                                                         |
|------------------------------|----------------|--------------------------------------------------------|--------------------------------------------------------------------------------------------------------------------|------------------------|---------------------------------------------------------------------------------------------|---------------------------------------------------------------------------------------------------------------|-------------------------------------------------------------------------|
| Stasiak et al, 2022(34)      | Case series    | M, 51 years, NA medical history                        | Pfizer/BioNtech BNT 16b2                                                                                           | 21 days after 2nd dose | Tachycardia, fever, right anterior cervical pain, excessive sweating                        | Prednisone                                                                                                    | Symptoms rapidly improved                                               |
|                              |                | M, 45 years, previous SAT 20 years before              | Pfizer/BioNtech BNT 16b2                                                                                           | 21 days after 2nd dose | Symptoms recurred with slightly less severe cervical pain than during the first SAT episode | Prednisone                                                                                                    | Complete resolution of US lesions within 3 months                       |
| Bennet et al, 2022(35)       | Case report    | W, 52 years, NA medical history                        | Vaxzevria ChAdOx1                                                                                                  | 7 days after 1st dose  | NA                                                                                          | Propranolol                                                                                                   | Symptoms disappeared and TFTs were normalized within 7 weeks            |
| Kishimoto et al, 2022(36)    | Case series    | W, 54 years, no medical history                        | Pfizer/BioNtech BNT 16b2                                                                                           | 1 day after 2nd dose   | Fever, anterior cervical pain, general fatigue, shortness of breath                         | Prednisolone 20 mg/day                                                                                        | Symptoms rapidly improved, TFTs were normalized within 4 weeks          |
|                              |                | M, 46 years, hypercholesterolemia                      | Moderna mRNA-1273                                                                                                  | 10 days after 1st dose | Persistent fever, odynophagia, and bilateral anterior neck pain                             | Prednisolone 20 mg/day                                                                                        | Symptoms improved, TFTs were normalized within 3 months                 |
| Huo et al, 2022(37)          | Case report    | W, 65 years, diabetes                                  | NA                                                                                                                 | NA                     | Swallowing pain of right neck, headache, fever, fatigue                                     | Injecting the thyroid capsule with a mixture of 2% lidocaine (1 ml) and 0.5% dexamethasone (1 ml) for 3 times | Symptoms rapidly improved                                               |
| Adelmeyer et al, 2022(38)    | Case series    | W, 36 years, no medical history, smoker                | Pfizer/BioNtech BNT 16b2                                                                                           | 1 day after 2nd dose   | Cervical pain, restlessness, fatigue                                                        | Ibuprofen and then prednisolone 30 mg/day                                                                     | Treatment with prednisolone improved symptoms, TFTs were normalized     |
|                              |                | M, 65 years, sigmoid diverticulitis                    | Vaxzevria ChAdOx1                                                                                                  | 3 days after 1st dose  | Anterior cervical pain, hoarseness                                                          | No treatment                                                                                                  | Symptoms disappeared, TFTs were normalized within 1 month               |
| Borges Canha et al, 2022(39) | Case report    | W, 32 years, no medical history                        | Vaxzevria ChAdOx1                                                                                                  | 4 days after 1st dose  | Fever, painful swallowing and cervical pain                                                 | Prednisolone 40 mg/day                                                                                        | Symptoms improved within few days, TFTs were normalized within 5 months |
| Oğuz et al, 2022(40)         | Clinical study | W, 42 years, nodular thyroid disease                   | Pfizer/BioNtech BNT 16b2                                                                                           | 4 days after 1st dose  | NA                                                                                          | NSAIDs                                                                                                        | Symptoms disappeared within 14 weeks                                    |
|                              |                | W, 48 years, prior subacute thyroiditis 1 month before | Sinovac Biotech Coronavac                                                                                          | 1 day after 2nd dose   | NA                                                                                          | Prednisolone 5 mg/day and then 10 mg/day                                                                      | Symptoms disappeared within 5 weeks                                     |
|                              |                | W, 47 years, systemic lupus erythematosus              | Pfizer/BioNtech BNT 16b2                                                                                           | 10 days after 1st dose | NA                                                                                          | Occasional paracetamol                                                                                        | Symptoms disappeared within 13 weeks                                    |
|                              |                | W, 72 years, prior subacute thyroiditis                | Pfizer/BioNtech BNT 16b2 (1st and 2nd dose with Sinovac Biotech Coronavac, 3rd dose with Pfizer/BioNtech BNT 16b2) | 15 days after 4th dose | NA                                                                                          | No treatment                                                                                                  | Symptoms disappeared within 5 weeks                                     |
|                              |                | W, 50 years, MNG, prior subacute thyroiditis           | Sinovac Biotech Coronavac                                                                                          | 1 day after 1st dose   | NA                                                                                          | NSAIDs                                                                                                        | Symptoms disappeared within 6 weeks                                     |
|                              |                | W, 61 years, MNG                                       | Sinovac Biotech Coronavac                                                                                          | 15 days after 2nd dose | NA                                                                                          | Methylprednisolone 16 mg/day                                                                                  | Symptoms disappeared within 20 weeks                                    |
|                              |                | W, 36 years, no medical history                        | Sinovac Biotech Coronavac                                                                                          | 4 days after 2nd dose  | NA                                                                                          | Methylprednisolone 16 mg/day                                                                                  | Not in remission                                                        |
|                              |                | W, 38 years, no medical history                        | Sinovac Biotech Coronavac                                                                                          | 7 days after 2nd dose  | NA                                                                                          | No treatment                                                                                                  | Symptoms disappeared within 11 weeks                                    |
|                              |                | W, 38 years, no medical history                        | Pfizer/BioNtech BNT 16b2                                                                                           | 10 days after 1st dose | NA                                                                                          | NSAIDs                                                                                                        | Symptoms disappeared within 4 weeks                                     |
|                              |                | W, 38 years, no medical history                        | Sinovac Biotech Coronavac                                                                                          | 13 days after 1st dose | NA                                                                                          | Occasional paracetamol, NSAIDs during relapse                                                                 | Symptoms aggravated after 2nd dose and disappeared within 12 weeks      |

|                                                                                                |                                                                            |                            |                                                                                                                                                                                                                                     |                                                       |                                                                                                                                                                                                                                                 |
|------------------------------------------------------------------------------------------------|----------------------------------------------------------------------------|----------------------------|-------------------------------------------------------------------------------------------------------------------------------------------------------------------------------------------------------------------------------------|-------------------------------------------------------|-------------------------------------------------------------------------------------------------------------------------------------------------------------------------------------------------------------------------------------------------|
| W, 43 years, no medical history                                                                | Pfizer/BioNtech BNT 16b2                                                   | 7 days after 2nd dose      | NA                                                                                                                                                                                                                                  | Methylprednisolone 16 mg/day and NSAIDs               | Symptoms disappeared within 11 weeks                                                                                                                                                                                                            |
| W, 60 years, MNG, prior subtotal hemithyroidectomy, undifferentiated connective tissue disease | Pfizer/BioNtech BNT 16b2 (1st and 2nd dose with Sinovac Biotech Coronavac) | 3 days after 3rd dose      | NA                                                                                                                                                                                                                                  | No treatment                                          | Not in remission                                                                                                                                                                                                                                |
| W, 46 years, no medical history                                                                | Pfizer/BioNtech BNT 16b2                                                   | 0 days after 1st dose      | NA                                                                                                                                                                                                                                  | NSAIDs, Methylprednisolone 16 mg/day during relapse   | Symptoms aggravated after 2nd dose and disappeared within 18 weeks                                                                                                                                                                              |
| W, 34 years, no medical history                                                                | Sinovac Biotech Coronavac                                                  | 4 days after 1st dose      | NA                                                                                                                                                                                                                                  | Methylprednisolone 16 mg/day and methimazole 5 mg/day | Not in remission                                                                                                                                                                                                                                |
| M, 71 years, no medical history                                                                | Pfizer/BioNtech BNT 16b2 (1st and 2nd dose with Sinovac Biotech Coronavac) | 10 days after 3rd dose     | NA                                                                                                                                                                                                                                  | Prednisolone 20 mg/day                                | Not in remission                                                                                                                                                                                                                                |
| M, 41 years, NA medical history                                                                | Sinovac Biotech Coronavac                                                  | NA days after 3rd dose     | Sore throat, cervical pain                                                                                                                                                                                                          | Methylprednisolone                                    | Symptoms disappeared; two weeks after the second dose the patients suffered from neck pain and hoarseness, treated with ibuprofen. Overt hypothyroidism, treatment with levothyroxine was started                                               |
| W, 56 years, NA medical history                                                                | Moderna mRNA-1273                                                          | 7 days after 2nd dose      | Fatigue, severe weight loss, evening fever (39.5 °C) with intense perspiration, diarrhea episodes and tachycardia; anterior neck pain; TFTs consistent with hyperthyroidism; thyroid ultrasound suggestive for subacute thyroiditis | Prednisone                                            | Rapid clinical improvement and thyroid function normalization                                                                                                                                                                                   |
| W, 44 years, NA medical history                                                                | Pfizer/BioNtech BNT 16b2                                                   | 5 weeks after 1st dose     | Severe anterior right neck pain associated with headache; TSH within normal range, elevated c reactive protein; thyroid ultrasound suggestive for subacute thyroiditis                                                              | Prednisone                                            | Her complaints regressed 3 days after treatment initiation, but pain reappeared at the end of the corticosteroid therapy. Reintroduction of prednisone was effective. She received a second dose 4 months after the first without complications |
| W, 38 years, no significant medical history                                                    | Vaxzevria ChAdOx1                                                          | 5 days after 2nd dose      | Headache, vertigo, fatigue, palpitations, shortness of breath, small amplitude tremors, and sweating episodes. TFTs showed suppressed TSH, high fT3 and fT4 values, negative anti-thyroid antibodies                                | Metoprolol                                            | After 3 months of following, all clinical symptoms disappeared. Thyroid hormone tests came back normal                                                                                                                                          |
| M, 26 years, no significant medical history                                                    | Moderna mRNA-1273                                                          | Immediately after 2nd dose | Fever, headache, mild neck pain, and palpation. Shortly after, he developed limb weakness and difficulty in walking. TFTs showed suppressed TSH, high fT3 and fT4 values, very low potassium                                        | Prednisolone, potassium chloride                      | Diagnosed with subacute thyroiditis and thyrotoxic periodic paralysis. On day 160, the TSH level was normalized.                                                                                                                                |
| W, 32 years, NA medical history                                                                | Sinopharm Beijing                                                          | 3 days after 2nd dose      | Anterior neck pain and swelling, palpitations; TFTs showed low TSH, high fT3 and fT4, positive TPOAb and TGAb, negative TRAb and elevated c reactive protein; ultrasound and scintigraphy                                           | Celecoxib and propranolol                             | Neck pain was relieved 20 days later; hypoechoic areas disappeared 6 months later. The thyroid function turned out to hypothyroidism requiring levothyroxine                                                                                    |

consistent with SAT

### Graves' Disease

| Author, year                | Study design | Patient(s)                                                            | Type of vaccine          | Latency between vaccine and symptoms | Clinical presentation                                                                                                    | Treatment                                            | Outcome/Conclusions                                                                                                               |
|-----------------------------|--------------|-----------------------------------------------------------------------|--------------------------|--------------------------------------|--------------------------------------------------------------------------------------------------------------------------|------------------------------------------------------|-----------------------------------------------------------------------------------------------------------------------------------|
| Lee et al, 2021(16)         | Case series  | W, 46 years, no medical history                                       | Vaxzevria ChAdOx1        | 1 day after 1st dose                 | Chest pain and dyspnea                                                                                                   | NA                                                   | Diagnosed with Graves' disease with heart failure                                                                                 |
|                             |              | W, 73 years, normal thyroid function before                           | Vaxzevria ChAdOx1        | 14 days after 2nd dose               | Weight loss, dyspnea                                                                                                     | NA                                                   | Diagnosed with Graves' disease                                                                                                    |
|                             |              | M, 34 years                                                           | Janssen Ad26.COV2.S      | 14 days after 1st dose               | Weight loss, palpitation                                                                                                 | NA                                                   | Diagnosed with recurrent Graves' disease                                                                                          |
|                             |              | M, 39 years                                                           | Janssen Ad26.COV2.S      | 14 days after 1st dose               | Fever, neck pain                                                                                                         | NA                                                   | Diagnosed with concurrent Graves' disease and subacute thyroiditis                                                                |
|                             |              | M, 33 years                                                           | Janssen Ad26.COV2.S      | 14 days after 1st dose               | Both leg weakness                                                                                                        | NA                                                   | Diagnosed with painless thyroiditis with thyrotoxic periodic paralysis                                                            |
| Pla Peris et al, 2021(27)   | Case series  | W, 71 years                                                           | Pfizer/BioNtech BNT 16b2 | 60 days after 2nd dose               | Weight loss, asthma, atrial fibrillation                                                                                 | Methimazole                                          | Diagnosed with Graves' disease. Improvement in symptoms, TSHR-Ab remained positive 2 months later;                                |
|                             |              | W, 42 years                                                           | Pfizer/BioNtech BNT 16b2 | 10-14 days after 1st dose            | Weight loss, asthma, palpitations                                                                                        | Methimazole                                          | Diagnosed with Graves' disease. Improvement in symptoms, TSHR-Ab remained positive 2 months later                                 |
|                             |              | W, 54 years                                                           | Moderna mRNA-1273        | 10-14 days after 2nd dose            | Weight loss, asthma, palpitations                                                                                        | Methimazole                                          | Diagnosed with Graves' disease. Improvement in symptoms                                                                           |
|                             |              | W, 46 years                                                           | Pfizer/BioNtech BNT 16b2 | 50 days after 1st dose               | Weight loss, palpitations, irritability                                                                                  | Methimazole                                          | Diagnosed with Graves' disease. Improvement in symptoms                                                                           |
|                             |              | W, 69 years                                                           | Pfizer/BioNtech BNT 16b2 | 10-14 days after 1st dose            | Neck pain, mild fever. Weight loss, palpitation, hand tremor                                                             | Methimazole and non-steroidal antiinflammatory drugs | Diagnosed with concurrent Graves' disease and subacute thyroiditis. Improvement in symptoms                                       |
| Zettinig et al, 2021(46)    | Case series  | W, 61 years                                                           | Pfizer/BioNtech BNT 16b2 | 35 days after 2nd dose               | Sweating, palpitations                                                                                                   | Methimazole                                          | Diagnosed with Graves' disease. TFTs were quickly corrected                                                                       |
|                             |              | W, 38 years                                                           | Pfizer/BioNtech BNT 16b2 | 12 days after 1st dose               | Insomnia, nervousness, high sweating                                                                                     | Methimazole                                          | Diagnosed with Graves' disease. TFTs were quickly corrected                                                                       |
| Raven et al, 2021(47)       | Case report  | W, 35 years no medical history                                        | Vaxzevria ChAdOx1        | 5 days after 1st dose                | Palpitations, heat intolerance, hyperphagia, tremor                                                                      | Carbimazole                                          | Diagnosed with Graves' disease. Still in follow up                                                                                |
| Vera-Lastra et al, 2021(48) | Case series  | W, 40 years, arterial hypertension and a history of COVID-19 8 months | Pfizer/BioNtech BNT 16b2 | 2 days after 1st dose                | Nausea, vomiting, fatigue, insomnia, and palpitations, sinus tachycardia and episodes of paroxysmal atrial fibrillation. | Propranolol, ivabradine, diltiazem, and thiamazole   | Diagnosed with Graves' disease. Good response to treatment                                                                        |
|                             |              | W, 28 years, no medical history                                       | Pfizer/BioNtech BNT 16b2 | 3 days after 1st dose                | Anxiety, insomnia, palpitations and distal tremor                                                                        | Propranolol and thiamazole                           | Diagnosed with Graves' disease. Good response to treatment                                                                        |
| Lui et al, 2021(49)         | Case report  | W, 40 years, no medical history                                       | Pfizer/BioNtech BNT 16b2 | 5 days after 2nd dose                | Palpitations and tachycardia                                                                                             | Carbimazole and propranolol                          | Diagnosed with Graves' disease. Improvement in the thyroid function                                                               |
| Weintraub et al, 2021(50)   | Case series  | W, 38 years                                                           | Moderna mRNA-1273        | 7 days after 1st dose                | Abdominal pain, fever, tachycardia                                                                                       | Methimazole and propranolol                          | Diagnosed with Graves' disease. Reported improved energy level and denied recurrence of palpitations or abdominal pain.           |
|                             |              | W, 68 years                                                           | Pfizer/BioNtech BNT 16b2 | 28 days after 2nd dose               | Pruritic rash                                                                                                            | No medication                                        | Diagnosed with Graves' disease. After 6 months, TSH was normalised                                                                |
|                             |              | M, 30 years                                                           | VaxzevriaChAdOx1         | 2 days after 2nd dose                | Palpitations, tremor, weight loss, irritability                                                                          | Methimazole and atenolol                             | Diagnosed with Graves' disease. His irritability and restless sleep improved; however, he still endorsed occasional palpitations. |

|                                  |             |                                                                                                                                     |                          |                                   |                                                                                                                     |                                                                    |                                                                                                                                                                                                                                            |
|----------------------------------|-------------|-------------------------------------------------------------------------------------------------------------------------------------|--------------------------|-----------------------------------|---------------------------------------------------------------------------------------------------------------------|--------------------------------------------------------------------|--------------------------------------------------------------------------------------------------------------------------------------------------------------------------------------------------------------------------------------------|
| Sriphrapradang . et al, 2021(51) | Case report | M, 70 years, no medical history                                                                                                     | Vaxzevria ChAdOx1        | 2 days after 2nd dose             | Weight loss, dyspnea, myalgia, and palpitation                                                                      | Methimazole                                                        | Diagnosed with Graves' disease. Good response to treatment                                                                                                                                                                                 |
| Pierman et al, 2021(52)          | Case report | W, 34 years, no medical history                                                                                                     | Pfizer/BioNtech BNT 16b2 | 10 days after 1st dose            | Eyelid swelling, weight loss, tremor, sweating, dyspnea                                                             | Thiamazole                                                         | Diagnosed with Graves' disease. Still in follow up                                                                                                                                                                                         |
| Patrizio et al, 2021(53)         | Case report | M, 52 years, history of vitiligo vulgaris and 8 years type 2 diabetes mellitus                                                      | Pfizer/BioNtechBNT 16b2  | 28 days after 2nd dose            | Weight loss, myalgia, dyspnea and palpitation                                                                       | Methimazole and atenolol                                           | Diagnosed with Graves' disease. Progressive improvement in symptoms, disappearance of fever and normalisation of thyroid hormones.                                                                                                         |
| Goblirsch et al, 2021(54)        | Case report | W, 71 years, history of stage 4 breast cancer in remission, struma ovarii at age 35 years and clinically stable multinodular goitre | Pfizer/BioNtechBNT 16b2  | 14 days after 2nd dose            | Tachycardia, breath shortness, sweating, dizziness, hand tremors, nausea                                            | Methimazole and atenolol                                           | Diagnosed with Graves' disease. Improvement in symptoms. Now clinically stable. Resolved tachycardia and her FT4 and total FT3 levels have returned to baseline.                                                                           |
| Sriphrapradang et al, 2021(55)   | Case report | W, 30 years, active GD for 3 years, euthyroid with MMI 2.5 mg/day                                                                   | VaxzevriaChAdOx1         | 4 days after 1 <sup>st</sup> dose | Palpitations, lost weight of 2 kg despite an increased appetite,                                                    | Methimazole (increasing dose from 2.5 to 5 mg) and add propranolol | Diagnosed with relapsed Graves' Disease. Thyrotoxic symptoms were improved. TFTs at 1 month after an adjusted methimazole dose remained T3-toxicosis                                                                                       |
| Rubinstein et al, 2021(56)       | Case report | W, 50 years, GD treated with radioactive iodine, hypertension, anxiety                                                              | Pfizer/BioNtechBNT 16b2  | 3 days after 2nd dose             | Eye irritation, tearing, visual changes, orbital pain, and proptosis of the eyes bilaterally, left more than right. | Intravenous teprotumumab.                                          | Diagnosed with rapidly developing Graves' ophthalmopathy. After the second dose, she had significant improvement in congestive symptoms, in addition to 1mm reduction in proptosis of the OD and 3mm of the left.                          |
| Di Filippo et al, 2021(57)       | Case series | M, 32 years, no medical history                                                                                                     | VaxzevriaChAdOx1         | 10 days after 2nd dose            | Anxiety, tachycardia and palpitations                                                                               | Methimazole (switched toPTU after rush) and propranolol            | Diagnosed with Graves' disease. TFTs normalised after 3 months                                                                                                                                                                             |
|                                  |             | M, 35, no medical history                                                                                                           | VaxzevriaChAdOx1         | 5 days after 1st dose             | Headache, nausea, asthenia, palpitations, tachycardia, mild eyes-redness and superior palpebral retraction.         | Thiamazole and propranolol                                         | Diagnosed with Graves' disease. After three months of therapy his thyroid function and TRAbs levels are currently normal on 5 mg/daily dose of thiamazole. Patient was counselled elsewhere not to undergo the second dose of the vaccine. |
| Lui et al, 2021(49)              | Case report | W, 40 years, history of subclinical hypothyroidism in therapy with thyroxine                                                        | Pfizer/BioNtechBNT 16b2  | 39 days after 2nd dose            | Palpitation and sinus tachycardia                                                                                   | Stopped Thyroxine and started Carbimazole and propranolol.         | Diagnosed with Graves' disease. Improvement in the thyroid function.                                                                                                                                                                       |
| Pujol et al, 2022(3)             | Case report | W, 38 years, schizophrenia                                                                                                          | Pfizer/BioNtech BNT 16b2 | 12 days after 1st dose            | Nervousness, insomnia and sweating                                                                                  | Methimazole                                                        | Diagnosed with Graves' disease                                                                                                                                                                                                             |
| Taieb et al, 2022(58)            | Case report | W, 43 years, no medical history                                                                                                     | Pfizer/BioNtech BNT 16b2 | 3 days after 1st dose             | Diarrhea and palpitations                                                                                           | Thiamazole and propranolol                                         | Diagnosed with Graves' disease. TFTs normalised after 3 months                                                                                                                                                                             |
| Chee et al, 2022(59)             | Case series | W, 33 years                                                                                                                         | mRNA                     | 7 days after 1st dose             | NA                                                                                                                  | Carbimazole and propranolol                                        | Diagnosed with Graves' disease. TFTs normalised after 28 days                                                                                                                                                                              |
|                                  |             | W, 37 years                                                                                                                         | mRNA                     | 7 days after 1st dose             | NA                                                                                                                  | Carbimazole and propranolol                                        | Diagnosed with Graves' disease. TFTs normalised after 32 days                                                                                                                                                                              |
|                                  |             | W, 37 years                                                                                                                         | mRNA                     | 21 days after 2st dose            | NA                                                                                                                  | Carbimazole and propranolol                                        | Diagnosed with Graves' disease. TFTs normalised after 53 days                                                                                                                                                                              |
|                                  |             | M, 34 years                                                                                                                         | mRNA                     | 26 days after 1st dose            | NA                                                                                                                  | Carbimazole and propranolol                                        | Diagnosed with Graves' disease. TFTs normalised after 58 days                                                                                                                                                                              |
|                                  |             | W, 33 years                                                                                                                         | mRNA                     | 9 days after 2st dose             | NA                                                                                                                  | Carbimazole and propranolol                                        | Diagnosed with Graves' disease. TFTs normalised after 64 days                                                                                                                                                                              |
|                                  |             | W, 43 years                                                                                                                         | mRNA                     | 13 days after 2st dose            | NA                                                                                                                  | Carbimazole                                                        | Diagnosed with Graves' disease. TFTs normalised after 57 days                                                                                                                                                                              |
|                                  |             | M, 59 years                                                                                                                         | mRNA                     | 21 days after 1st dose            | NA                                                                                                                  | Carbimazole                                                        | Diagnosed with Graves' disease. Still in follow up                                                                                                                                                                                         |



|                                                                                                                                                 |                         |                                                                                                   |                                                                                                           |                                                       |                                                                                                                                                                |              |                                                    |
|-------------------------------------------------------------------------------------------------------------------------------------------------|-------------------------|---------------------------------------------------------------------------------------------------|-----------------------------------------------------------------------------------------------------------|-------------------------------------------------------|----------------------------------------------------------------------------------------------------------------------------------------------------------------|--------------|----------------------------------------------------|
| W, 74 years                                                                                                                                     | mRNA                    | Asymptomatic (TFTs performed aspart of routine follow up 11 days after 2nd dose)                  | NA                                                                                                        | Carbimazole                                           | Diagnosed with Graves' disease.                                                                                                                                |              |                                                    |
| W, 25 years                                                                                                                                     | mRNA                    | Asymptomatic (TFT performed as part of routine follow up 31 days after 2nd dose)                  | NA                                                                                                        | Carbimazole                                           | Diagnosed with Graves' disease. TFTs normalised after 123 days                                                                                                 |              |                                                    |
| W, 41 years                                                                                                                                     | mRNA                    | 28 days after 2st dose                                                                            | NA                                                                                                        | Carbimazole                                           | Diagnosed with Graves' disease. TFTs normalised after 31 days                                                                                                  |              |                                                    |
| W, 24 years                                                                                                                                     | mRNA                    | Asymptomatic (TFTs performed aspart of routine follow up 63 days after 2nd dose)                  | NA                                                                                                        | Carbimazole                                           | Diagnosed with Graves' disease. TFTs normalised after 42 days                                                                                                  |              |                                                    |
| W, 22 years                                                                                                                                     | mRNA                    | 5 days after 1st dose                                                                             | NA                                                                                                        | Carbimazole and propranolol                           | Diagnosed with Graves' disease. TFTs normalised after 178 days                                                                                                 |              |                                                    |
| Patrizio et al, 2022(60)                                                                                                                        | Case series             | W, 58 years GD and GO in remission for 2 year (definitive therapy for GD with radioactive iodine) | Pfizer/BioNtechBNT 16b2                                                                                   | 3 days after 2nd dose                                 | Chemosis, redness of eyelids and conjunctiva, periorbital edema, painnand foreign object sensation innthe eyes and diplopia, CAS 6/10                          | Teprotumumab | Diagnosed with worsening of Graves' ophthalmopathy |
| M, 43 years, previous GD 1 year before                                                                                                          | Pfizer/BioNtechBNT 16b2 | 14 days after 1st dose                                                                            | Proptosis, CAS 8/10, abduction deficit with diplopia, bilateral exposure keratopathy due to lagophthalmos | NA                                                    | Diagnosed with worsening of Graves' ophthalmopathy                                                                                                             |              |                                                    |
| W, 66 years, history of GD (treated with radioactive iodine) and TED stable for over15 years                                                    | Moderna mRNA-1273       | 21 days after 2nd dose                                                                            | Diplopia, bilateral eye-bulging, and pain with eye movement, CAS 6/10                                     | Teprotumumab                                          | Diagnosed with thyroid eye disease reactivation.Symptoms were improving at 5 months                                                                            |              |                                                    |
| W, 53 years, recently started methimazole for low TSH                                                                                           | Pfizer/BioNtechBNT 16b2 | 1 day after 1st dose                                                                              | Bulging and pain with eye movement in the right eye and occasional diplopia                               | Teprotumumab                                          | Diagnosed with new onset of thyroid eye disease. Symptoms were improving at 8 months                                                                           |              |                                                    |
| W, 45 years, history of Hashimoto's thyroiditis, TED, stable for 5 years, and bilateral hyaluronic acid fillerinjections several months before. | Moderna mRNA-1273       | 21 days after 1st dose, worsened afterthe 2nd                                                     | Worsening eyelid swelling, pain, redness, or diplopia.                                                    | No medication                                         | Diagnosed with thyroid eye disease reactivation. Four months later, the eyelid swelling reduced, and her thyroid function tests normalised without treatment.  |              |                                                    |
| M, 32 years, diagnosis of COVID-19 infection 10 days after 1st dose                                                                             | Pfizer/BioNtechBNT 16b2 | 17 days after 1st dose                                                                            | Palpitations, insomnia, tremor, irritability, diaphoresis, and dyspnoea at rest.                          | Methimazole, propranolol, 7- day course of Prednisone | Diagnosed with Graves' disease. After six weeks of treatment, the patient's symptoms improved progressively, and T3 and T4 levels normalised withintwo months. |              |                                                    |
| W, 44 years, GD in remission (for 12 years)                                                                                                     | Cororavac               | 7 days after 1st dose                                                                             | Excessive sweating, palpitation, and fatigue, enlarged thyroid gland.                                     | Methimazole andpropranolol                            | Diagnosed with relapsed Graves' Disease                                                                                                                        |              |                                                    |
| M, 49 years, GD in remission (for 1 year)                                                                                                       | Pfizer/BioNtechBNT 16b2 | 30 days after 2nd dose                                                                            | Palpitations, hand tremors, and sweating                                                                  | Methimazole andpropranolol                            | Diagnosed with relapsed Graves' Disease. TFTsnormalised after 1 month                                                                                          |              |                                                    |

|                                                                                               |                          |                        |                                                                                                                                                                                     |                                                                                       |                                                                                                                                                                                               |
|-----------------------------------------------------------------------------------------------|--------------------------|------------------------|-------------------------------------------------------------------------------------------------------------------------------------------------------------------------------------|---------------------------------------------------------------------------------------|-----------------------------------------------------------------------------------------------------------------------------------------------------------------------------------------------|
| W, 31 years GD in remission (for 1 year), breast cancer in remission.                         | Pfizer/BioNtechBNT 16b2  | 21 days after 1st dose | Hot flushes, weakness, and sweating                                                                                                                                                 | Methimazole and propranolol                                                           | Diagnosed with relapsed Graves' Disease. TFTs normalised after 5 weeks                                                                                                                        |
| W, 51 years, DM, HT                                                                           | Pfizer/BioNtechBNT 16b2  | 4 days after 2nd dose  | Proptosis, irritation, and dryness, especially in the right eye, impaired blood pressure control, palpitations, sweating, and fever.                                                | Methimazole and propranolol. Total thyroidectomy (after 4 month of medical treatment) | Diagnosed with rapidly developing Graves' ophthalmopathy. After thyroidectomy, her ocular findings showed a significant regression.                                                           |
| W, 47 years, no medical history                                                               | Pfizer/BioNtech BNT 16b2 | 5 days after 1st dose  | Sweating and palpitations                                                                                                                                                           | Methimazole and propranolol                                                           | Diagnosed with Graves' disease. TFTs normalised after 1 month                                                                                                                                 |
| W, 46 years, obesity                                                                          | Pfizer/BioNtech BNT 16b2 | 21 days after 2nd dose | Emotional lability, sweating, palpitations, and weight loss                                                                                                                         | Methimazole and propranolol                                                           | Diagnosed with Graves' disease. TFTs normalised after 1 month                                                                                                                                 |
| W, 53 years, Hashimoto's thyroiditis (for 2 years)                                            | Pfizer/BioNtechBNT 16b2  | 7 days after 2nd dose  | Palpitations, sweating, and weight loss                                                                                                                                             | Stopped L.T. Started Methimazole and propranolol                                      | Conversion from Hashimoto's thyroiditis to Graves' disease. Two months later, the FT4 level decreased to 0.9 ng/dL and FT3 decreased to 2.37 ng/L, and the MMI dose was reduced to 10 mg/day. |
| Singh et al, 2022(64)                                                                         | Case series              | 2 days after 3rd dose  | Nausea, muscle weakness, sweating, weight loss, difficult in sleeping                                                                                                               | Methimazole and propranolol                                                           | NA                                                                                                                                                                                            |
| F, 68 years, no medical history                                                               | Janssen Ad26.COV2.S      | 1 day after 1st dose   | Constellation of non-specific symptoms and atrial fibrillation                                                                                                                      | Methimazole and betablocker                                                           | NA                                                                                                                                                                                            |
| M, 41 years, history of GD in remission                                                       | Moderna mRNA-1273        | 1 day after 1st dose   | Generalized muscle aches and weakness tremors and palpitations                                                                                                                      | Carbimazole                                                                           | Diagnosed with relapsed Graves' Disease                                                                                                                                                       |
| W, 45 years, no medical history                                                               | Pfizer/BioNtech BNT 16b2 | 2 days after 1st dose  | Chest tightness and palpitations                                                                                                                                                    | Carbimazole                                                                           | Diagnosed with new onset Graves' disease                                                                                                                                                      |
| M, 22 years, history of ulcerative colitis and nephrotic syndrome                             | Pfizer/BioNtech BNT 16b2 | 2 weeks after 1st dose | Subtle tremors in both upper extremities; TFTs consistent with hyperthyroidism, positivity of TRABs                                                                                 | Methimazole; subsequent hypothyroidism (treated)                                      | Diagnosed with new onset Graves' disease; progression to hypothyroidism                                                                                                                       |
| W, 31 years, history of type 1 diabetes mellitus; previous silent thyroiditis at 23 years old | Pfizer/BioNtech BNT 16b2 | 7 days after 2nd dose  | Excessive sweating, diarrhea, and shortness of breath during exertion; TFTs consistent with hyperthyroidism; ultrasonography revealed diffuse hyper perfusion in the thyroid gland  | Methimazole                                                                           | Diagnosed with new onset Graves' disease; thyroid function normalization after 3 months of therapy                                                                                            |
| M, 57 years, not known medical history                                                        | VaxzevriaChAdOx1         | 2 days after vaccine   | Tremor, palpitations, 3 kg weight loss, fatigue; TFTs consistent with hyperthyroidism; negative TRABs; consistent with Graves' disease                                              | Thiamazole and propranolol                                                            | Diagnosed with new onset Graves' disease; thyroid function normalization after 6 months                                                                                                       |
| W, 44 years, known for Hashimoto's thyroiditis under levothyroxine                            | Pfizer/BioNtech BNT 16b2 | 5 days after 1st dose  | Low TSH levels; thyroid ultrasound showing enlarged and hyper vascularized gland; positivity of TRABs                                                                               | Reduction of levothyroxine                                                            | Diagnosed with conversion from Hashimoto's to Graves' disease; received 2nd dose without further complications                                                                                |
| M, 50 years, no significant medical history                                                   | Pfizer/BioNtech BNT 16b2 | 14 days after 1st dose | Fatigue, palpitations, distal tremor, insomnia, anxiety, and irritability; TFTs consistent with hyperthyroidism, thyroid ultrasound and scintigraphy suggestive for Graves' disease | Methimazole                                                                           | Diagnosed with new onset Graves' disease; thyroid function normalization after 6 months (under low dose of methimazole)                                                                       |

**Other thyroid function alterations**

| Author, year              | Study design | Patient(s)                                                                                              | Type of vaccine          | Latency between vaccine and symptoms | Clinical presentation                                                                                                                                                                   | Treatment                                                                                                    | Outcome/Conclusions                                                                                                                                                                                                                                                                                                |
|---------------------------|--------------|---------------------------------------------------------------------------------------------------------|--------------------------|--------------------------------------|-----------------------------------------------------------------------------------------------------------------------------------------------------------------------------------------|--------------------------------------------------------------------------------------------------------------|--------------------------------------------------------------------------------------------------------------------------------------------------------------------------------------------------------------------------------------------------------------------------------------------------------------------|
| Giusti et al, 2021(70)    | Case report  | W, 61 years, nomedical history                                                                          | Pfizer/BioNtechBNT 16b2  | 21 days after 2nd dose               | Swelling of neck and face, without pain, asthenia, and weight gain                                                                                                                      | Levothyroxine and Betamethasone                                                                              | Diagnosed with overt hypothyroidism and myxoedema features. TFTs normalised after 3 months. Decrease of thyroid volume. Positive thyroid antibodies and the hypochoic pattern of the gland slightly changed. The neck and facial swelling of the patient improved, while her body weight only minimally changed.   |
| Raven et al, 2022(47)     | Case report  | W, 35 years, previous history of left hemithyroidectomy 3 years prior for a benign 31-mm thyroid nodule | Pfizer/BioNtechBNT 16b2  | 4 days after 1st dose                | Right side neck pain. Thyroid function remained normal.                                                                                                                                 | No treatment                                                                                                 | Diagnosed with focal painful Thyroiditis After 2nd dose vaccine, neck pain increased along with fatigue, fevers, and night sweats. Over the following 2 weeks, the pain resolved.                                                                                                                                  |
| Capezone et al, 2022(71)  | Case series  | M, 34 years, no medical history                                                                         | Moderna mRNA-1273        | 7 days after 1st dose                | Palpitation and weight loss                                                                                                                                                             | No treatment                                                                                                 | Diagnosed with silent thyroiditis. TFTs normalised after 33 days                                                                                                                                                                                                                                                   |
|                           |              | W, 29 years, no medical history                                                                         | Moderna mRNA-1273        | 7 days after 1st dose                | Palpitation and weight loss                                                                                                                                                             | No treatment                                                                                                 | Diagnosed with silent thyroiditis. TFTs normalized after 29 days                                                                                                                                                                                                                                                   |
| Nakaizumi et al, 2022(72) | Case series  | W, 38 years                                                                                             | Pfizer/BioNtech BNT 16b2 | 17 days after 1st dose               | Palpitations                                                                                                                                                                            | No treatment                                                                                                 | Diagnosed with focal painless thyroiditis. TFTs normalised after 5 months                                                                                                                                                                                                                                          |
|                           |              | W, 59 years                                                                                             | Pfizer/BioNtechBNT 16b2  | 10 days after 2nd dose               | Abnormal TFTs was incidentally detected on a blood test. She was asymptomatic, and her physical examination results were unremarkable.                                                  | No treatment                                                                                                 | Diagnosed with focal painless thyroiditis. TFTs normalised after 2 months                                                                                                                                                                                                                                          |
| Yamamoto et al, 2022(73)  | Case report  | W, 64 years, history of colorectal cancer, diabetes mellitus, obesity                                   | Pfizer/BioNtechBNT 16b2  | 4 days after 1st dose                | Shortness of breath palpitations, worsening respiratory distress, decreased urine output, edema of both lower legs, and a fever, heart failure complicated with atrial fibrillation     | Thiamazole, potassium iodine, corticosteroid, furosemide and Carvedilol                                      | She was diagnosed as having a thyrotoxic crisis complicated with atrial fibrillation, and heart failure. General condition improved rapidly, and her respiratory distress disappeared after 5 days. TFTs normalized after 2 weeks. The patient refused thyroidectomy and preferred to be maintained by medication. |
| Ruggeri et al, 2022(69)   | Case series  | W, 55 years, known for Hashimoto's thyroiditis, euthyroid                                               | Moderna mRNA-1273        | 10 days after 1st dose               | Fatigue, tremors and palpitations. TFTs demonstrated suppressed TSH, elevated FT4 and FT3 levels; scintigraphy consistent with destructive thyroiditis                                  | No treatment                                                                                                 | Four weeks later, her TFTs showed subclinical hypothyroidism. Six months after, due to persistent subclinical hypothyroidism, levothyroxine treatment was started, with subsequent TFTs normalization                                                                                                              |
| Marsukjaj et al, 2022(74) | Case report  | M, 61 years, previous history of Graves' disease, in remission                                          | Pfizer/BioNtechBNT 16b2  | 15 days after 3rd dose               | Fatigue and muscle weakness, decreased concentration, loss of memory, depression, increased sensitivity to cold, constipation. TFTs revealed overt hypothyroidism with TPOAb positivity | Levothyroxine                                                                                                | Diagnosed with autoimmune hypothyroidism. TFTs normalization at follow-up after 6 months                                                                                                                                                                                                                           |
|                           |              | W, 55 years, hypertension and hypercholesterolemia                                                      | Vaxzevria ChAdOx1        | 14 days after 2nd dose               | Palpitations. High troponin I values and TFTs suggestive for hyperthyroidism; thyroid ultrasound suggestive for SAT; cardiac MRI: myocarditis                                           | Propranolol                                                                                                  | Concomitant myocarditis and painless thyroiditis. Spontaneous normalization of thyroid function                                                                                                                                                                                                                    |
| Poli et al, 2022(75)      | Case report  | M, 65 years, with a medical history of acute disseminated encephalomyelitis                             | Pfizer/BioNtech BNT 16b2 | 3 days after 3rd dose                | Paresis of the left arm, loss of pain and temperature sensation on the right side of the body, right-sided deafness with vertigo, fluctuating binocular horizontal diplopia and         | high-dose intravenous methylprednisolone, intravenous immunoglobulin therapy, plasmapheresis, pyridostigmine | Diagnosed with myasthenia gravis and autoimmune thyroiditis. After plasmapheresis, anti-thyroid antibodies turned out negative                                                                                                                                                                                     |

is  
 prosis of the right eye;  
 Immunologic testing showed elevated anti-acetylcholine antibody, anti-thyroglobulin antibodies, anti-thyroid peroxidase antibodies and anti-TSH receptor antibodies positivity (Thyroid function was normal)

### Adrenal gland

| Author, year                | Study design | Patient(s)                                                    | Type of vaccine     | Latency between vaccine and symptoms     | Clinical presentation                                                                                                                                                                                                                                                                               | Treatment                                                                                                                     | Outcome/Conclusions                                                                                                                                         |
|-----------------------------|--------------|---------------------------------------------------------------|---------------------|------------------------------------------|-----------------------------------------------------------------------------------------------------------------------------------------------------------------------------------------------------------------------------------------------------------------------------------------------------|-------------------------------------------------------------------------------------------------------------------------------|-------------------------------------------------------------------------------------------------------------------------------------------------------------|
| Taylor et al, 2021(76)      | Case report  | M, 38 years, no significant medical history                   | Vaxzevria ChAdOx1   | 8 days after 1st dose                    | Severe abdominal pain and vomiting. Bilateral adrenal haemorrhage (CT findings); pulmonary embolism, cerebral venous thrombosis. Exams consistent with VITT                                                                                                                                         | Intravenous hydrocortisone and methylprednisolone, intravenous immunoglobulins and direct thrombin inhibitor; plasma exchange | Diagnosed with bilateral adrenal haemorrhage. Discharged at home with chronic steroid therapy on the presumption of long-term primary adrenal insufficiency |
| Varona et al, 2021(77)      | Case report  | M, 47 years, no significant medical history                   | Vaxzevria ChAdOx1   | 10 days (not specified after which dose) | Headache, somnolence, hypotension, abdominal pain. Bilateral pulmonary embolism, cerebral venous thrombosis, bilateral adrenal haemorrhage (MRI findings); low cortisol, exams consistent with VITT                                                                                                 | Hormone replacement therapy with hydrocortisone, intravenous immunoglobulins and subcutaneous fondaparinux                    | Diagnosed with bilateral adrenal haemorrhage. Discharged at home with chronic steroid therapy on the presumption of long-term primary adrenal insufficiency |
| Tews et al, 2022(78)        | Case report  | M, 39 years, no significant medical history, active smoker    | Janssen Ad26.COV2.S | 8 days after 1st dose                    | Severe pain in the left thorax and upper abdomen. Deep vein thrombosis, bilateral pulmonary embolism, bilateral adrenal haemorrhage (MRI findings). Exams consistent with VITT                                                                                                                      | Hormone replacement therapy with hydrocortisone, intravenous immunoglobulins and direct thrombin inhibitor                    | Diagnosed with bilateral adrenal haemorrhage. Discharged at home with chronic steroid therapy on the presumption of long-term primary adrenal insufficiency |
| Blauenfeldt et al, 2021(79) | Case report  | W, 60 years, Hashimoto thyroiditis and hypertension           | Vaxzevria ChAdOx1   | 7 days after 1st dose                    | Intractable abdominal pain, left-side signs. Bilateral adrenal haemorrhage (CT scan findings), massive ischemic stroke (occlusion of right internal carotid artery). Thrombocytopenia and positivity to anti PF-4 antibodies                                                                        | Hormone replacement therapy with hydrocortisone, platelet transfusion, hemicraniectomy, dalteparin, palliative treatment      | Diagnosed with acute ischemic stroke and bleeding. Deceased after 6 days of hospitalization                                                                 |
| D'Agostino et al, 2021(80)  | Case report  | W, 54 years, Meniere's disease                                | Vaxzevria ChAdOx1   | 12 days after 1st dose                   | Left-side signs; signs of DIC. Multiple subacute cerebral hemorrhages, acute basilar thrombosis and superior sagittal sinus thrombosis, myocardial infarction; right suprahepatic vein thrombosis, bilateral pulmonary embolism, bilateral adrenal haemorrhage (CT scan findings). Thrombocytopenia | Angioplasty, intensive care treatment                                                                                         | Diagnosed with DIC and cerebral venous thrombosis. Deceased after 5 days of hospitalization                                                                 |
| Maguire et al, 2021(81)     | Case-series  | 5 (3W, 2M) aged 41-74 years, with known adrenal insufficiency | Vaxzevria ChAdOx1   | 8-24 h after 1st dose                    | Headache, severe fatigue, abdominal cramps, watery diarrhoea, nausea                                                                                                                                                                                                                                | Double dose of oral steroid for 2 days; intramuscular steroid                                                                 | Diagnosed with adrenal crisis. Rapidly improved                                                                                                             |

|                             |             |                                                                                                                      |                          |                                         |                                                                                                                                                                                                                                                                                                                       |                                                                                                    |                                                                                                                  |
|-----------------------------|-------------|----------------------------------------------------------------------------------------------------------------------|--------------------------|-----------------------------------------|-----------------------------------------------------------------------------------------------------------------------------------------------------------------------------------------------------------------------------------------------------------------------------------------------------------------------|----------------------------------------------------------------------------------------------------|------------------------------------------------------------------------------------------------------------------|
| Haji et al, 2021(82)        | Case report | M, 63 years, no significant medical history, daily marijuana use                                                     | Janssen Ad26.COV2.S      | 24 h after 1st dose                     | Neuroendocrine crisis with nausea, vomiting, dyspnoea, watery diarrhoea, chills, sweats, and heavy chest pain, acute hypertension. Elevated 24h urinary metanephrines; 7 cm heterogenic mass in right adrenal gland (ultrasound)                                                                                      | Intubated, antihypertensive drugs, adrenal mass resection (pheochromocytoma)                       | Diagnosed with pheochromocytoma. Discharged at home with chronic therapy and endocrinologic follow-up indication |
| Al Rawahi et al, 2021(83)   | Case report | M, 64 years, hypertension and hyperlipidemia                                                                         | Vaxzevria ChAdOx1        | 7 days (not specified after which dose) | Fever, lethargy, abdominal pain. Pulmonary embolism, left renal vein thrombosis with renal infarction, bilateral adrenal haemorrhage (CT scan findings), exams consistent with VITT                                                                                                                                   | Hormone replacement therapy with hydrocortisone, platelet transfusion, argatroban and fondaparinux | Diagnosed with bilateral adrenal haemorrhage. Discharged at home with chronic steroid therapy                    |
| Graf et al, 2022(84)        | Case series | 1M, 46 years, current smoker and drinker<br>1W, 38 years, gastro-oesophageal reflux disease, osteoarthritis, obesity | Vaxzevria ChAdOx1        | 8-11 days after 1st dose                | Abdominal and back pain, nausea and vomiting; pulmonary embolism, portal vein thrombosis, renal cortical infarcts, myocardial infarction, dural venous sinus thrombosis, cerebral infarction, bilateral/ unilateral adrenal haemorrhage (CT scan findings); exams consistent with VITT                                | Hormone replacement therapy with hydrocortisone, intensive care treatment                          | Diagnosed with bilateral/ unilateral adrenal haemorrhage. Discharged at home with chronic steroid therapy        |
| Efthymiadis et al, 2022(85) | Case report | W, 23 years, obesity, family history (not 1 <sup>st</sup> degree) of venous thromboembolism                          | Vaxzevria ChAdOx1        | 8 days after 1st dose                   | Acute pleuritic chest pain, fever and headaches, seizures. CT and MRI findings (at 16 days after 1st dose): multiple lobar and segmental pulmonary emboli, bilateral adrenal haemorrhage and splenic vein thrombosis, posterior reversible encephalopathy<br>Exams consistent with VITT, positive anti-PF4 antibodies | Intensive care treatment, anticoagulants, intravenous hydrocortisone                               | Diagnosed with bilateral adrenal haemorrhage. Discharged at home with chronic steroid and anticoagulant therapy  |
| Markovic et al, 2022(86)    | Case report | M, 74 years, known for adrenal insufficiency (hypopituitarism), T2DM, hypertension                                   | Pfizer/BioNTech BNT 16b2 | Few hours after the 2nd dose            | Altered mental status and fever, severe hypoglycaemia                                                                                                                                                                                                                                                                 | Intravenous hydrocortisone                                                                         | Diagnosed with adrenal crisis. Rapidly improved                                                                  |

### *Pituitary Gland*

| Author, year                  | Study design | Patient(s)                                  | Type of vaccine   | Latency between vaccine and symptoms         | Clinical presentation                                                                                                                                                                                                                                 | Treatment                                                 | Outcome/Conclusions                                                                                                |
|-------------------------------|--------------|---------------------------------------------|-------------------|----------------------------------------------|-------------------------------------------------------------------------------------------------------------------------------------------------------------------------------------------------------------------------------------------------------|-----------------------------------------------------------|--------------------------------------------------------------------------------------------------------------------|
| Murvelashvili et al, 2021(87) | Case report  | M, 51 years, no significant medical history | Moderna mRNA-1273 | 3 days after 1st dose; 2 days after 2nd dose | Nausea, vomiting, abdominal pain; blood examinations showed hyponatremia, central hypothyroidism, secondary hypogonadism, undetectable cortisol; enlargement of the pituitary gland (CT and MRI findings) and thickening of the pituitary stalk (MRI) | Intravenous dexamethasone and thyroid hormone replacement | Diagnosed with hypophysitis. after 1 month, MRI revealed markedly diminished enlargement with a mostly empty sella |

|                                 |             |                                                                                              |                          |                                   |                                                                                                                                                                                                                                                                                                                 |                                                                         |                                                                                                                                   |
|---------------------------------|-------------|----------------------------------------------------------------------------------------------|--------------------------|-----------------------------------|-----------------------------------------------------------------------------------------------------------------------------------------------------------------------------------------------------------------------------------------------------------------------------------------------------------------|-------------------------------------------------------------------------|-----------------------------------------------------------------------------------------------------------------------------------|
| Lindner et al, 2021(88)         | Case report | M, 79 years, previous ischemic cerebrovascular insult, gastritis and gastroesophageal reflux | Moderna mRNA-1273        | 10 days after 2nd dose            | Weakness, fatigue and anorexia. Hyponatremia with high urine osmolality                                                                                                                                                                                                                                         | Intravenous crystalloid solutions, fluid restriction, oral (SIADH) urea | Diagnosed with Syndrome of Inappropriate Antidiuresis                                                                             |
| Pinar-Gutiérrez et al, 2022(89) | Case report | W, 37 years, not known medical history                                                       | Vaxzevria ChAdOx1        | 5 days after 1st dose             | High-intensity frontal headache: at MRI, adenohypophysis haemorrhagic bleeding in association with a 10 mm intraglandular adenoma without chiasmatic involvement was found; no hormonal deficits                                                                                                                | None                                                                    | Diagnosed with pituitary apoplexy without hormonal deficits                                                                       |
| Roncati et al, 2022(90)         | Case report | W, 28 years, no significant medical history                                                  | Vaxzevria ChAdOx1        | 24h after the 1st dose - 2 months | Tension type headache worsened after second dose, accompanied by amenorrhea and hyperprolactinemia; MRI performed 69 days after second dose showed haemorrhagic event in the right half of the sella                                                                                                            | Not reported                                                            | Diagnosed with pituitary apoplexy with secondary amenorrhea                                                                       |
| Bouça et al, 2022(91)           | Case report | W, 37 years, rheumatoid arthritis                                                            | Pfizer/BioNtech BNT 16b2 | 7 days after the 2nd dose         | Intense thirst and polyuria, urine volume 10200 mL/24h, urine osmolality 75 mOs/Kg, urine density 1.002; MRI showed loss of the posterior pituitary bright spot                                                                                                                                                 | Oral desmopressin 0.06 mg twice a day                                   | Diagnosed with Central Diabetes Insipidus                                                                                         |
| Ankireddy palli et al, 2022(92) | Case report | W, 48 years, no significant medical history                                                  | Pfizer/BioNtech BNT 16b2 | 2 days after the 1st dose         | Flu-like symptoms, severe headache, myalgia, polyuria (4l/die), polydipsia, fatigue, nausea, weight loss, low IGF-1, no menses after the 1 <sup>st</sup> dose; MRI revealed a 4 mm, round, thickened pituitary stalk and a partially empty sella                                                                | 10 mcg of desmopressin nasal sprays twice a day                         | Diagnosed with hypophysitis with acute onset of diabetes insipidus                                                                |
| Morita et al, 2022(93)          | Case report | M, 31 years                                                                                  | Pfizer/BioNtech BNT 16b2 | 1-4 days after the 2nd dose       | General fatigue, fever, headache, nausea, and diarrhoea; hyponatremia, hypoglycaemia, low plasma ACTH and serum cortisol levels; MRI (after the replacement with HC) revealed moderate atrophy of the pituitary gland with a preserved high intensity of the posterior pituitary gland by the T1-weighted image | Hydrocortisone replacement therapy                                      | Diagnosed with isolated adrenocorticotrophic hormone (ACTH) deficiency debuted with adrenal crisis                                |
| Mizuno et al, 2022(94)          | Case report | M, 48 years, epilepsy (under valproate and levetiracetam), end-stage renal disease, smoker   | Pfizer/BioNtech BNT 16b2 | 7 days after the 1st dose         | fever, generalized weakness, diaphoresis, muscle rigidity, altered mental status. Blood examinations showed elevated creatine kinase (CK) and C-reactive protein (CRP), low ACTH and cortisol levels, confirmed at ACTH stimulation test                                                                        | Intravenous followed by oral hydrocortisone                             | Diagnosed with neuroleptic malignant syndrome (NMS) with central adrenal insufficiency; discharged at home on oral hydrocortisone |

## Type 1 Diabetes Mellitus

### New onset of T1DM

| Author, year             | Study design | Patient(s)                                                                            | Type of vaccine              | Latency between vaccine and symptoms | Clinical presentation                                                                                                                                                                                                                                                                                                        | Treatment                      | Outcome/Conclusions                                                                                                                                                                                        |
|--------------------------|--------------|---------------------------------------------------------------------------------------|------------------------------|--------------------------------------|------------------------------------------------------------------------------------------------------------------------------------------------------------------------------------------------------------------------------------------------------------------------------------------------------------------------------|--------------------------------|------------------------------------------------------------------------------------------------------------------------------------------------------------------------------------------------------------|
| Patrizio et al, 2021(55) | Case report  | M, 52 years, type 2 diabetic treated with oral antidiabetic agents, vitiligo vulgaris | Pfizer/BioNtech BNT 16b2     | 28 days after 2nd dose               | Fever, weight loss, asthenia, hyperthyroidism, poor glycaemic control; positivity of thyrotropin receptor antibodies and thyroid enlargement; positivity of pancreatic autoantibodies against glutamic acid decarboxylase 65, very low serum C-peptide level                                                                 | Methimazole, Atenolol, Insulin | Diagnosed with acute onset type 1 diabetes and Graves' disease<br>Discharged at home with methimazole and Insulin therapy                                                                                  |
| Ohuchi et al, 2021(95)   | Case report  | M, 45 years, treated with nivolumab for melanoma                                      | Pfizer/BioNtech BNT 16b2     | 3 days after 2nd dose                | Fatigue, dry mouth, increased urine frequency, and prominent weight loss; hyperglycaemia, decreased C-peptide reactivity                                                                                                                                                                                                     | Not reported                   | Diagnosed with fulminant type 1 diabetes mellitus caused by nivolumab, probably triggered by vaccination for COVID-19                                                                                      |
| Yano et al, 2022(96)     | Case report  | W, 51 years, no significant medical history                                           | Moderna mRNA-1273            | 28 days after 1st dose               | Fatigue, thirst, polyuria, polydipsia, weight loss, tachycardia and reduced skin turgor, suggesting mild dehydration; hyperglycaemia, ketoacidosis, exhaustion of endogenous insulin secretion, positive insulin autoantibody, positivity of HLA for type 1 diabetes. Symptoms significantly worsened 2 days after 2nd dose. | Intravenous fluids and insulin | Diagnosed with acute-onset type 1 diabetes; discharged at home with insulin                                                                                                                                |
| Tang et al, 2022(97)     | Case report  | M, 50 years, no significant medical history                                           | Sinovac Biotech<br>Coronavac | 5 days after 1st dose                | Fever, polydipsia, polyuria; hyperglycaemia, ketoacidosis, undetectable/low serum C-peptide level, positivity of HLA for fulminant type 1 diabetes                                                                                                                                                                           | Intravenous fluids and insulin | Diagnosed with fulminant type 1 diabetes. DKA was resolved promptly, and he was placed on a subcutaneous insulin regimen. Four weeks after disease onset, he had an almost complete loss of islet function |
| Sasaki et al, 2022(98)   | Case report  | W, 45 years<br>Bronchial asthma                                                       | Pfizer/BioNtech BNT 16b2     | 6 days after 2nd dose                | Nausea, abdominal pain, fatigue, polydipsia and weight loss; hyperglycaemia, ketoacidosis, exhaustion of endogenous insulin secretion, positivity of HLA for fulminant type 1 diabetes                                                                                                                                       | Intravenous fluids and insulin | Diagnosed with fulminant type 1 diabetes. Discharged at home with insulin                                                                                                                                  |
| Sasaki et al, 2022(99)   | Case report  | W, 73 years, known for glucose intolerance treated with diet and exercise             | Moderna mRNA-1273            | 49 days after 2nd dose               | Anorexia, fatigue, nausea and vomiting; hyperglycaemia, low serum C-peptide level, positivity of anti-glutamic acid decarboxylase antibody and insulin autoantibody, positivity of HLA for type 1 diabetes                                                                                                                   | Intensive insulin therapy      | Diagnosed with type 1 diabetes without complications                                                                                                                                                       |
| Sakurai et al, 2022(100) | Case report  | W, 36 years, no significant medical history                                           | Pfizer/BioNtech BNT 16b2     | 3 days after 1st dose                | Thirst, polydipsia, polyuria, palpitations, loss of appetite, fatigue; hyperglycaemia, ketoacidosis, decrease serum C-peptide, positivity of HLA for type 1 diabetes                                                                                                                                                         | Intravenous fluids and insulin | Diagnosed with acute-onset type 1 diabetes; discharged at home with insulin                                                                                                                                |

|                            |             |                                                                                                  |                                                                           |                             |                                                                                                                                                                                                     |                                                                               |                                                                                                       |
|----------------------------|-------------|--------------------------------------------------------------------------------------------------|---------------------------------------------------------------------------|-----------------------------|-----------------------------------------------------------------------------------------------------------------------------------------------------------------------------------------------------|-------------------------------------------------------------------------------|-------------------------------------------------------------------------------------------------------|
| Makiguchi et al, 2022(101) | Case report | W, 65 years, lung carcinoma with brain metastases, panhypopituitarism, under immuno-therapy      | Pfizer/BioNtech BNT 16b2                                                  | A few days after 2nd dose   | Fatigue, extensive erythema on the trunk; ketoacidosis, markedly decreased of urine C-peptide level                                                                                                 | Unknown                                                                       | Diagnosed with acute-onset type 1 diabetes                                                            |
| Bleve et al, 2022(102)     | Case series | W, 57 years, family history for T2D and autoimmune diseases (vitiligo and Hashimoto thyroiditis) | Vaxzevria ChAdOx1-S                                                       | A few days after 1st dose   | Polydipsia, elevated blood glucose values (> 300 mg/dL), glycosuria (> 1000 mg/dL), ketonuria and asthenia; elevated levels of anti-GAD, Anti-IA2, and antitransglutaminase IgA antibody were found | Intravenous fluids and insulin                                                | Diagnosed with autoimmune diabetes                                                                    |
| Aydoğan et al, 2022(103)   | Case series | W, 61 years, hypothyroidism                                                                      | Pfizer/BioNtech BNT 16b2                                                  | A few days after 2nd dose   | Dyspnoea, nausea, and abdominal pain, polyuria, polydipsia, and asthenia; elevated levels of FPG (640 mg/dl) and metabolic acidosis; elevated levels of anti-GAD                                    | Intravenous fluids and insulin                                                | Diagnosed with autoimmune diabetes. Discharged with basal-bolus insulin therapy regimen               |
|                            | Case series | M, 56 years, vitiligo, Hashimoto's thyroiditis                                                   | Pfizer/BioNtech BNT 16b2                                                  | 15 days after the 2nd dose  | Weight loss, dry mouth, polyuria, and polydipsia; high levels of FPG; positive anti-GAD65                                                                                                           | Intravenous fluids and insulin                                                | Discharged insulin therapy; discontinued treatment after 3 months due to hypoglycaemia                |
|                            | Case series | M, 48 years, no significant medical history                                                      | Pfizer/BioNtech BNT 16b2                                                  | 2 months after the 2nd dose | Fatigue, high FPG and HbA1c, positive anti-GAD65                                                                                                                                                    | The patient refused insulin treatment, but received medical nutrition therapy | Nutrition therapy                                                                                     |
|                            | Case series | M, 36 years, no significant medical history                                                      | Sinovac Biotech Coronavac (2 doses)<br>Pfizer/BioNtech BNT 16b2 (2 doses) | 1 month after 2nd dose      | Fatigue, dizziness, unintentional weight loss, and dry mouth; elevated levels of FPG (656 mg/dl) and metabolic acidosis; elevated levels of anti-GAD                                                | Intravenous fluids and insulin                                                | Diagnosed with autoimmune diabetes. Discharged with basal-bolus insulin therapy regimen               |
|                            | Case series | W, 27 years, no significant medical history                                                      | Pfizer/BioNtech BNT 16b2                                                  | 3 weeks after the 2nd dose  | Blurred vision, polyuria, polydipsia, weight loss, and vaginal candidiasis, high FPG and HbA1c, positive anti-GAD65                                                                                 | Basal-bolus insulin therapy regimen                                           | Diagnosed with autoimmune diabetes. Discharged with basal-bolus insulin therapy regimen; discontinued |
| Sato et al, 2022(104)      | Case report | M, 43 years, malignant melanoma under nivolumab                                                  | mRNA-based SARS-CoV-2 vaccination                                         | 2 days after the 2nd dose   | Thirst, polydipsia, and polyuria, weight loss, elevated levels of FPG and metabolic acidosis; panel for autoimmunity tested negative                                                                | Intravenous fluids and insulin                                                | Discharged with basal-bolus insulin therapy regimen                                                   |

### Glycaemic alterations in T1DM Patients

| Author, year           | Study design | Patient(s)                                                                                                                                 | Type of vaccine          | Latency between vaccine and symptoms | Clinical presentation                                                                                                                                                                | Treatment                                                    | Outcome/Conclusions                              |
|------------------------|--------------|--------------------------------------------------------------------------------------------------------------------------------------------|--------------------------|--------------------------------------|--------------------------------------------------------------------------------------------------------------------------------------------------------------------------------------|--------------------------------------------------------------|--------------------------------------------------|
| Yakou et al, 2022(105) | Case series  | W, 71 years, type 1 diabetes mellitus at 56 years of age, history of Basedow disease                                                       | Pfizer/BioNtech BNT 16b2 | Less than 12 h after 1st dose        | Nausea, fatigue, impaired consciousness, tachycardia and tachypnea; severe ketoacidosis, undetectable serum C-peptide level, positive for antiglucuramic acid decarboxylase antibody | Intravenous insulin, Ringer's solution, and glucose infusion | Diagnosed with DKA. Discharged with home therapy |
|                        | Case series  | W, 52 years, poorly controlled type 1 diabetes mellitus for 5 years, drinking habit - consumed 20 g of alcohol on the night before vaccine | Pfizer/BioNtech BNT 16b2 | Less than 12 h after 2nd dose        | Nausea, palpitation, respiratory distress, tachycardia and tachypnea; hyperglycaemia, ketoacidosis                                                                                   | Intravenous insulin, Ringer's solution, and glucose infusion | Diagnosed with DKA. Discharged with home therapy |



|                             |             |                                                                                                        |                                            |                                                  |                                                                                                                                                                             |                                                                        |                                                                                |
|-----------------------------|-------------|--------------------------------------------------------------------------------------------------------|--------------------------------------------|--------------------------------------------------|-----------------------------------------------------------------------------------------------------------------------------------------------------------------------------|------------------------------------------------------------------------|--------------------------------------------------------------------------------|
| Ganakumar et al, 2022(106)  | Case series | M, 20 years, type 1 diabetes mellitus for 6 years<br>W, 25 years, type 1 diabetes mellitus for 6 years | Vaxzevria ChAdOx1                          | 3 days after 2nd dose                            | Abdominal pain, nausea, vomiting; severe ketoacidosis                                                                                                                       | Intravenous fluids and insulin                                         | Diagnosed with severe DKA. Discharged with home therapy                        |
| Zilbermint et al, 2022(107) | Case report | W, 24 years, known for T1DM                                                                            | Bharat Biotech BBV512<br>Moderna mRNA-1273 | 6 days after 2nd dose<br>15 hours after 2nd dose | Fever, myalgia, nausea, vomiting, abdominal pain; severe ketoacidosis<br>Severe nausea, tachycardia, tachypnoea; hyperglycaemia, ketoacidosis, transient insulin resistance | Intravenous fluids and insulin                                         | Diagnosed with severe DKA. Discharged with home therapy                        |
| Infante et al, 2022(108)    | Case report | M, 24 years, known for T1DM under only low basal insulin daily doses                                   | Pfizer/BioNtech BNT 16b2                   | First days after both doses                      | Deterioration in his glucose control, with moderate increase in the frequency of postprandial hyperglycemic episodes                                                        | Need to resume the mealtime rapid-acting insulin injections for 7 days | Three months after vaccines shots the patient was still in the honeymoon phase |

### Male reproductive system

| Author, year                    | Study design | Patient(s)                              | Type of vaccine          | Latency between vaccine and symptoms | Clinical presentation                                                                                    | Treatment | Outcome/Conclusions                    |
|---------------------------------|--------------|-----------------------------------------|--------------------------|--------------------------------------|----------------------------------------------------------------------------------------------------------|-----------|----------------------------------------|
| Chatzimeletiou et al, 2022(109) | Case report  | M, 43 years with ankylosing spondylitis | Pfizer/BioNtech BNT 16b2 | /                                    | Semen analysis performed during therapy with anti-inflammatory drugs before and after 3 doses of vaccine |           | No negative effect on sperm parameters |

**Abbreviations:** SAT: subacute thyroiditis; TFTs: thyroid function tests; NSAIDs: Non-steroidal anti-inflammatory drugs; NA: not acquired; TPOAb: thyroid peroxidase antibodies; TRAbs: TSH receptor antibodies; CT: computed tomography; VITT: Vaccine-Induced Immune Thrombotic Thrombocytopenia; PF-4: platelet factor 4; MRI: magnetic resonance imaging; DIC: disseminated intravascular coagulation; SIADH: Syndrome of Inappropriate Antidiuresis; ACTH: adrenocorticotrophic hormone; T1DM: type 1 diabetes mellitus; DKA: diabetic ketoacidosis; HLA: Human Leukocyte Antigen; GAD: glutamic acid decarboxylase; IA2: Islet Antigen 2; FPG: fasting plasma glucose; T2DM: type 2 diabetes mellitus



1. İremli BG, Şendur SN, Ünlütürk U. Three Cases of Subacute Thyroiditis Following SARS-CoV-2 Vaccine: Postvaccination ASIA Syndrome. *J Clin Endocrinol Metab.* 2021;106(9):2600-5.
2. Franquemont S, Galvez J. Subacute Thyroiditis After mRNA vaccine for Covid-19. *J Endocr Soc.* 2021;5:A956-A7.
3. Pujol A, Gómez LA, Gallegos C, Nicolau J, Sanchís P, González-Freire M, et al. Thyroid as a target of adjuvant autoimmunity/inflammatory syndrome due to mRNA-based SARS-CoV2 vaccination: from Graves' disease to silent thyroiditis. *J Endocrinol Invest.* 2022;45(4):875-82.
4. Saygılı ES, Karakilic E. Subacute thyroiditis after inactive SARS-CoV-2 vaccine. *BMJ Case Rep.* 2021;14(10).
5. Şahin Tekin M, Şaylısoy S, Yorulmaz G. Subacute thyroiditis following COVID-19 vaccination in a 67-year-old male patient: a case report. *Hum Vaccin Immunother.* 2021;17(11):4090-2.
6. Bornemann C, Woyk K, Bouter C. Case Report: Two Cases of Subacute Thyroiditis Following SARS-CoV-2 Vaccination. *Front Med (Lausanne).* 2021;8:737142.
7. Plaza-Enriquez L, Khatiwada P, Sanchez-Valenzuela M, Sikha A. A Case Report of Subacute Thyroiditis following mRNA COVID-19 Vaccine. *Case Rep Endocrinol.* 2021;2021:8952048.
8. Siolos A, Gartzonika K, Tigas S. Thyroiditis following vaccination against COVID-19: Report of two cases and review of the literature. *Metabol Open.* 2021;12:100136.
9. Schimmel J, Alba EL, Chen A, Russell M, Srinath R. Thyroiditis and Thyrotoxicosis After the SARS-CoV-2 mRNA Vaccine. *Thyroid.* 2021;31(9):1440.
10. Oyibo SO. Subacute Thyroiditis After Receiving the Adenovirus-Vectored Vaccine for Coronavirus Disease (COVID-19). *Cureus.* 2021;13(6):e16045.
11. Ratnayake GM, Dworakowska D, Grossman AB. Can COVID-19 immunisation cause subacute thyroiditis? *Clin Endocrinol (Oxf).* 2021.
12. Chatzi S, Karampela A, Spiliopoulou C, Boutzios G. Subacute thyroiditis after SARS-CoV-2 vaccination: a report of two sisters and summary of the literature. *Hormones (Athens).* 2022;21(1):177-9.
13. Jeeyavudeen MS, Patrick AW, Gibb FW, Dover AR. COVID-19 vaccine-associated subacute thyroiditis: an unusual suspect for de Quervain's thyroiditis. *BMJ Case Rep.* 2021;14(11).
14. Kyriacou A, Ioakim S, Syed AA. COVID-19 vaccination and a severe pain in the neck. *Eur J Intern Med.* 2021;94:95-6.
15. Soltanpoor P, Norouzi G. Subacute thyroiditis following COVID-19 vaccination. *Clin Case Rep.* 2021;9(10):e04812.
16. Lee KA, Kim YJ, Jin HY. Thyrotoxicosis after COVID-19 vaccination: seven case reports and a literature review. *Endocrine.* 2021;74(3):470-2.
17. Khan F, Brassill MJ. Subacute thyroiditis post-Pfizer-BioNTech mRNA vaccination for COVID-19. *Endocrinol Diabetes Metab Case Rep.* 2021;2021.
18. Leber HM, Sant'Ana L, Konichi da Silva NR, Raio MC, Mazzeo TJMM, Endo CM, et al. Acute Thyroiditis and Bilateral Optic Neuritis following SARS-CoV-2 Vaccination with CoronaVac: A Case Report. *Ocul Immunol Inflamm.* 2021;29(6):1200-6.
19. Sözen M, Topaloğlu Ö, Çetinarslan B, Selek A, Cantürk Z, Gezer E, et al. COVID-19 mRNA vaccine may trigger subacute thyroiditis. *Hum Vaccin Immunother.* 2021;17(12):5120-5.
20. Pandya M, Thota G, Wang X, Luo H. Thyroiditis after Coronavirus Disease 2019 (COVID-19) mRNA Vaccine: A Case Series. *AACE Clin Case Rep.* 2021.
21. Sigstad E, Grøholt KK, Westerheim O. Subacute thyroiditis after vaccination against SARS-CoV-2. *Tidsskr Nor Laegeforen.* 2021;141(2021-14).
22. González López J, Martín Niño I, Arana Molina C. Subacute thyroiditis after SARS-CoV-2 vaccination: report of two clinical cases. *Med Clin (Barc).* 2021.
23. Rebollar AF. [SUBACUTE THYROIDITIS AFTER ANTI SARS-COV-2 (Ad5-nCoV) VACCINE]. *Enferm Infecc Microbiol Clin.* 2021.
24. Ippolito S, Gallo D, Rossini A, Patera B, Lanzo N, Fazzino GFM, et al. SARS-CoV-2 vaccine-associated subacute thyroiditis: insights from a systematic review. *J Endocrinol Invest.* 2022.
25. Yorulmaz G, Sahin Tekin M. SARS-CoV-2 vaccine-associated subacute thyroiditis. *J Endocrinol Invest.* 2022.

26. Patel KR, Cunnane ME, Deschler DG. SARS-CoV-2 vaccine-induced subacute thyroiditis. *Am J Otolaryngol.* 2022;43(1):103211.
27. Pla Peris B, Merchante Alfaro A, Maravall Royo FJ, Abellán Galiana P, Pérez Naranjo S, González Boillos M. Thyrotoxicosis following SARS-COV-2 vaccination: a case series and discussion. *J Endocrinol Invest.* 2022;45(5):1071-7.
28. Bostan H, Unsal IO, Kizilgul M, Gul U, Sencar ME, Ucan B, et al. Two cases of subacute thyroiditis after different types of SARS-CoV-2 vaccination. *Arch Endocrinol Metab.* 2022;66(1):97-103.
29. Jhon M, Lee SH, Oh TH, Kang HC. Subacute Thyroiditis After Receiving the mRNA COVID-19 Vaccine (Moderna): The First Case Report and Literature Review in Korea. *J Korean Med Sci.* 2022;37(6):e39.
30. Vasileiou V, Paschou SA, Tzamali X, Mitropoulou M, Kanouta F, Psaltopoulou T, et al. Recurring subacute thyroiditis after SARS-CoV-2 mRNA vaccine: A case report. *Case Rep Womens Health.* 2022;33:e00378.
31. Das L, Bhadada SK, Sood A. Post-COVID-vaccine autoimmune/inflammatory syndrome in response to adjuvants (ASIA syndrome) manifesting as subacute thyroiditis. *J Endocrinol Invest.* 2022;45(2):465-7.
32. Bahçecioglu AB, Karahan ZC, Aydoğan BI, Kalkan IA, Azap A, Erdoğan MF. Subacute thyroiditis during the COVID-19 pandemic: a prospective study. *J Endocrinol Invest.* 2022;45(4):865-74.
33. Pipitone G, Rindi LV, Petrosillo N, Foti NAM, Caci G, Iaria C, et al. Vaccine-Induced Subacute Thyroiditis (De Quervain's) after mRNA Vaccine against SARS-CoV-2: A Case Report and Systematic Review. *Infect Dis Rep.* 2022;14(1):142-54.
34. Stasiak M, Zawadzka-Starczewska K, Lewiński A. Significance of HLA Haplotypes in Two Patients with Subacute Thyroiditis Triggered by mRNA-Based COVID-19 Vaccine. *Vaccines (Basel).* 2022;10(2).
35. Bennet WM, Elamin A, Newell-Price JD. Subacute thyroiditis following COVID-19 vaccination: Case report and Society for Endocrinology survey. *Clin Endocrinol (Oxf).* 2022.
36. Kishimoto M, Ishikawa T, Odawara M. Subacute thyroiditis with liver dysfunction following coronavirus disease 2019 (COVID-19) vaccination: report of two cases and a literature review. *Endocr J.* 2022.
37. Huo J, Qu R, Guo Y, Ou D. Nerve block therapy for subacute thyroiditis following COVID-19 vaccination: The first case report. *Asian J Surg.* 2022.
38. Adelmeyer J, Goebel JN, Kauka A, Kann PH. Two Case Reports of Subacute Thyroiditis after Receiving Vaccine for COVID-19. *Case Rep Endocrinol.* 2022;2022:3180004.
39. Borges Canha M, Neves JS, Oliveira AI, Sarmiento A, Carvalho D. Subacute Thyroiditis After Severe Acute Respiratory Syndrome Coronavirus 2 Vaxzevria Vaccination in a Patient With Thyroid Autoimmunity. *Cureus.* 2022;14(2):e22353.
40. Oğuz SH, Şendur SN, İremli BG, Gürlek A, Erbas T, Ünlütürk U. SARS-CoV-2 Vaccine-induced Thyroiditis: Safety of Revaccinations and Clinical Follow-up. *J Clin Endocrinol Metab.* 2022;107(5):e1823-e34.
41. Topaloglu O, Tekin S, Topaloglu S, Bayraktaroglu T. Persistent Subacute Thyroiditis Post SARS-CoV-2 Vaccine in a Male Patient with Positive Thyroid Autoantibodies. *TURKISH JOURNAL OF ENDOCRINOLOGY AND METABOLISM* 2022. p. 48-54.
42. Brès F, Joyeux MA, Delemer B, Vitellius G, Barraud S. Three cases of thyroiditis after COVID-19 RNA-vaccine. *Ann Endocrinol (Paris).* 2022;83(4):262-4.
43. Vu TB, Chu DT, Le DT, Hoang TTD, Gautret P, Hoang VT. Subacute thyroiditis after receiving the vaccine for COVID-19: a case report and literature review. *Clin Exp Vaccine Res.* 2022;11(2):226-9.
44. Murashita M, Wada N, Baba S, Sugawara H, Miyoshi A, Obara S. Subacute thyroiditis associated with thyrotoxic periodic paralysis after COVID-19 vaccination: a case report. *Endocrinol Diabetes Metab Case Rep.* 2022;2022.
45. Pi L, Lin J, Zheng Y, Wang Z, Zhou Z. Case Report: Subacute thyroiditis after receiving inactivated SARS-CoV-2 vaccine (BBIBP-CorV). *Front Med (Lausanne).* 2022;9:918721.
46. Zettinig G, Krebs M. Two further cases of Graves' disease following SARS-Cov-2 vaccination. *J Endocrinol Invest.* 2022;45(1):227-8.
47. Raven LM, McCormack AI, Greenfield JR. Letter to the Editor From Raven et al: "Three Cases of Subacute Thyroiditis Following SARS-CoV-2 Vaccine". *J Clin Endocrinol Metab.* 2022;107(4):e1767-e8.
48. Vera-Lastra O, Ordinola Navarro A, Cruz Domiguez MP, Medina G, Sánchez Valadez TI, Jara LJ. Two Cases of Graves' Disease Following SARS-CoV-2 Vaccination: An Autoimmune/Inflammatory

Syndrome Induced by Adjuvants. *Thyroid*. 2021;31(9):1436-9.

49. Lui DTW, Lee KK, Lee CH, Lee ACH, Hung IFN, Tan KCB. Development of Graves' Disease After SARS-CoV-2 mRNA Vaccination: A Case Report and Literature Review. *Front Public Health*. 2021;9:778964.
50. Weintraub MA, Ameer B, Sinha Gregory N. Graves Disease Following the SARS-CoV-2 Vaccine: Case Series. *J Investig Med High Impact Case Rep*. 2021;9:23247096211063356.
51. Sriphrapadang C, Shantavasinkul PC. Graves' disease following SARS-CoV-2 vaccination. *Endocrine*. 2021;74(3):473-4.
52. Pierman G, Delgrange E, Jonas C. Recurrence of Graves' Disease (a Th1-type Cytokine Disease) Following SARS-CoV-2 mRNA Vaccine Administration: A Simple Coincidence? *Eur J Case Rep Intern Med*. 2021;8(9):002807.
53. Patrizio A, Ferrari SM, Antonelli A, Fallahi P. A case of Graves' disease and type 1 diabetes mellitus following SARS-CoV-2 vaccination. *J Autoimmun*. 2021;125:102738.
54. Goblirsch TJ, Paulson AE, Tashko G, Mekonnen AJ. Graves' disease following administration of second dose of SARS-CoV-2 vaccine. *BMJ Case Rep*. 2021;14(12).
55. Sriphrapadang C. Aggravation of hyperthyroidism after heterologous prime-boost immunization with inactivated and adenovirus-vectored SARS-CoV-2 vaccine in a patient with Graves' disease. *Endocrine*. 2021;74(2):226-7.
56. Rubinstein TJ. Thyroid Eye Disease Following COVID-19 Vaccine in a Patient With a History Graves' Disease: A Case Report. *Ophthalmic Plast Reconstr Surg*. 2021;37(6):e221-e3.
57. di Filippo L, Castellino L, Giustina A. Occurrence and response to treatment of Graves' disease after COVID vaccination in two male patients. *Endocrine*. 2022;75(1):19-21.
58. Taieb A, Sawsen N, Asma BA, Ghada S, Hamza E, Yosra H, et al. A rare case of grave's disease after SARS-CoV-2 vaccine: is it an adjuvant effect? *Eur Rev Med Pharmacol Sci*. 2022;26(7):2627-30.
59. Chee YJ, Liew H, Hoi WH, Lee Y, Lim B, Chin HX, et al. SARS-CoV-2 mRNA Vaccination and Graves' Disease: a report of 12 cases and review of the literature. *J Clin Endocrinol Metab*. 2022.
60. Patrizio A, Ferrari SM, Antonelli A, Fallahi P. Worsening of Graves' ophthalmopathy after SARS-CoV-2 mRNA vaccination. *Autoimmun Rev*. 2022:103096.
61. Park KS, Fung SE, Ting M, Ozzello DJ, Yoon JS, Liu CY, et al. Thyroid eye disease reactivation associated with COVID-19 vaccination. *Taiwan J Ophthalmol*. 2022;12(1):93-6.
62. Hamouche W, El Soufi Y, Alzaraq S, Okafor BV, Zhang F, Paras C. A case report of new onset graves' disease induced by SARS-CoV-2 infection or vaccine? *J Clin Transl Endocrinol Case Rep*. 2022;23:100104.
63. Bostan H, Ucan B, Kizilgul M, Calapkulu M, Hepesen S, Gul U, et al. Relapsed and newly diagnosed Graves' disease due to immunization against COVID-19: A case series and review of the literature. *J Autoimmun*. 2022;128:102809.
64. Singh G, Howland T. Graves' Disease Following COVID-19 Vaccination. *Cureus*. 2022;14(4):e24418.
65. Chua MWJ. Graves' disease after COVID-19 vaccination. *Ann Acad Med Singap*. 2022;51(2):127-8.
66. Manta R, Martin C, Muls V, Poppe KG. New-onset Graves' disease following SARS-CoV-2 vaccination: a case report. *Eur Thyroid J*. 2022;11(4).
67. Sakai M, Takao K, Kato T, Ito K, Kubota S, Hirose T, et al. Graves' Disease after Administration of Severe Acute Respiratory Syndrome Coronavirus 2 (SARS-CoV-2) Vaccine in a Type 1 Diabetes Patient. *Intern Med*. 2022;61(10):1561-5.
68. Cuenca D, Aguilar-Soto M, Mercado M. A Case of Graves' Disease Following Vaccination with the Oxford-AstraZeneca SARS-CoV-2 Vaccine: Case Report and Review of the Literature. *Eur J Case Rep Intern Med*. 2022;9(4):003275.
69. Ruggeri RM, Giovanellla L, Campenni A. SARS-CoV-2 vaccine may trigger thyroid autoimmunity: real-life experience and review of the literature. *J Endocrinol Invest*. 2022.
70. Giusti M, Maio A. Acute thyroid swelling with severe hypothyroid myxoedema after COVID-19 vaccination. *Clin Case Rep*. 2021;9(12):e05217.
71. Capezzone M, Tosti-Balducci M, Morabito EM, Caldarelli GP, Sagnella A, Cantara S, et al. Silent thyroiditis following vaccination against COVID-19: report of two cases. *J Endocrinol Invest*. 2022;45(5):1079-83.
72. Nakaizumi N, Fukata S, Akamizu T. Painless thyroiditis following mRNA vaccination for COVID-

19. Hormones (Athens). 2022.

73. Yamamoto K, Mashiba T, Takano K, Suzuki T, Kami M, Takita M, et al. A Case of Exacerbation of Subclinical Hyperthyroidism after First Administration of BNT162b2 mRNA COVID-19 Vaccine. *Vaccines (Basel)*. 2021;9(10).

74. Marsukjai A, Theerasuwipakorn N, Tumkosit M, Chattranukulchai P, Srichomkwun P, Prechawat S. Concomitant myocarditis and painless thyroiditis after AstraZeneca coronavirus disease 2019 vaccination: a case report. *J Med Case Rep*. 2022;16(1):212.

75. Poli K, Poli S, Ziemann U. Multiple Autoimmune Syndromes Including Acute Disseminated Encephalomyelitis, Myasthenia Gravis, and Thyroiditis Following Messenger Ribonucleic Acid-Based COVID-19 Vaccination: A Case Report. *Front Neurol*. 2022;13:913515.

76. Taylor P, Allen L, Shrikrishnapalasuryar N, Stechman M, Rees A. Vaccine-induced thrombosis and thrombocytopenia with bilateral adrenal haemorrhage. *Clin Endocrinol (Oxf)*. 2021.

77. Varona JF, García-Isidro M, Moeinvaziri M, Ramos-López M, Fernández-Domínguez M. Primary adrenal insufficiency associated with Oxford-AstraZeneca ChAdOx1 nCoV-19 vaccine-induced immune thrombotic thrombocytopenia (VITT). *Eur J Intern Med*. 2021;91:90-2.

78. Tews HC, Driendl SM, Kandulski M, Buechler C, Heiss P, Stöckert P, et al. SARS-CoV-2 Vaccine-Induced Immune Thrombotic Thrombocytopenia with Venous Thrombosis, Pulmonary Embolism, and Adrenal Haemorrhage: A Case Report with Literature Review. *Vaccines (Basel)*. 2022;10(4).

79. Blauenfeldt RA, Kristensen SR, Ernstsén SL, Kristensen CCH, Simonsen CZ, Hvas AM. Thrombocytopenia with acute ischemic stroke and bleeding in a patient newly vaccinated with an adenoviral vector-based COVID-19 vaccine. *J Thromb Haemost*. 2021;19(7):1771-5.

80. D'Agostino V, Caranci F, Negro A, Piscitelli V, Tuccillo B, Fasano F, et al. A Rare Case of Cerebral Venous Thrombosis and Disseminated Intravascular Coagulation Temporally Associated to the COVID-19 Vaccine Administration. *J Pers Med*. 2021;11(4).

81. Maguire D, McLaren DS, Rasool I, Shah PM, Lynch J, Murray RD. ChAdOx1 SARS-CoV-2 vaccination: A putative precipitant of adrenal crises. *Clin Endocrinol (Oxf)*. 2021.

82. Haji N, Ali S, Wahashi EA, Khalid M, Ramamurthi K. Johnson and Johnson COVID-19 Vaccination Triggering Pheochromocytoma Multisystem Crisis. *Cureus*. 2021;13(9):e18196.

83. Al Rawahi B, BaTaher H, Jaffer Z, Al-Balushi A, Al-Mazrouqi A, Al-Balushi N. Vaccine-induced immune thrombotic thrombocytopenia following AstraZeneca (ChAdOx1 nCoV19) vaccine-A case report. *Res Pract Thromb Haemost*. 2021;5(6):e12578.

84. Graf, Anneke, Armeni, Eleni, Dickinson, Louise, et al. Adrenal haemorrhage and infarction in the setting of vaccine-induced immune thrombocytopenia and thrombosis after SARS-CoV-2 (Oxford–AstraZeneca) vaccination2022; (1).

85. Efthymiadis A, Khan D, Pavord S, Pal A. A case of ChAdOx1 vaccine-induced thrombocytopenia and thrombosis syndrome leading to bilateral adrenal haemorrhage and adrenal insufficiency. *Endocrinol Diabetes Metab Case Rep*. 2022;2022.

86. Markovic N, Faizan A, Boradia C, Nambi S. Adrenal Crisis Secondary to COVID-19 Vaccination in a Patient With Hypopituitarism. *AACE Clin Case Rep*. 2022;8(4):171-3.

87. Murvelashvili N, Tessnow A. A Case of Hypophysitis Following Immunization With the mRNA-1273 SARS-CoV-2 Vaccine. *J Investig Med High Impact Case Rep*. 2021;9:23247096211043386.

88. Lindner G, Ryser B. The syndrome of inappropriate antidiuresis after vaccination against COVID-19: case report. *BMC Infect Dis*. 2021;21(1):1000.

89. Piñar-Gutiérrez A, Remón-Ruiz P, Soto-Moreno A. Case report: Pituitary apoplexy after COVID-19 vaccination. *Med Clin (Barc)*. 2021.

90. Roncati L, Manenti A. Pituitary apoplexy following adenoviral vector-based COVID-19 vaccination. *Brain Hemorrhages*. 2022.

91. Bouça B, Roldão M, Bogalho P, Cerqueira L, Silva-Nunes J. Central Diabetes Insipidus Following Immunization With BNT162b2 mRNA COVID-19 Vaccine: A Case Report. *Front Endocrinol (Lausanne)*. 2022;13:889074.

92. Ankiredypalli A, Chow LS, Radulescu A, Kawakami Y, Araki T. A case of hypophysitis associated with SARS-CoV2 vaccination. *AACE Clin Case Rep*. 2022.

93. Morita S, Tsuji T, Kishimoto S, Uraki S, Takeshima K, Iwakura H, et al. Isolated ACTH deficiency following immunization with the BNT162b2 SARS-CoV-2 vaccine: a case report. *BMC Endocr Disord*. 2022;22(1):185.

94. Mizuno T, Takahashi R, Kamiyama T, Suzuki A, Suzuki M. Neuroleptic Malignant Syndrome with Adrenal Insufficiency After BNT162b2 COVID-19 Vaccination in a Man Taking Valproate: A Case Report. *Am J Case Rep.* 2022;23:e936217.
95. Ohuchi K, Amagai R, Tamabuchi E, Kambayashi Y, Fujimura T. Fulminant type 1 diabetes mellitus triggered by coronavirus disease 2019 vaccination in an advanced melanoma patient given adjuvant nivolumab therapy. *J Dermatol.* 2022;49(5):e167-e8.
96. Yano M, Morioka T, Natsuki Y, Sasaki K, Kakutani Y, Ochi A, et al. New-onset Type 1 Diabetes after COVID-19 mRNA Vaccination. *Intern Med.* 2022;61(8):1197-200.
97. Tang X, He B, Liu Z, Zhou Z, Li X. Fulminant type 1 diabetes after COVID-19 vaccination. *Diabetes Metab.* 2022;48(2):101324.
98. Sasaki K, Morioka T, Okada N, Natsuki Y, Kakutani Y, Ochi A, et al. New-onset fulminant type 1 diabetes after severe acute respiratory syndrome coronavirus 2 vaccination: A case report. *J Diabetes Investig.* 2022.
99. Sasaki H, Itoh A, Watanabe Y, Nakajima Y, Saisho Y, Irie J, et al. Newly developed type 1 diabetes after coronavirus disease 2019 vaccination: A case report. *J Diabetes Investig.* 2022.
100. Sakurai K, Narita D, Saito N, Ueno T, Sato R, Niitsuma S, et al. Type 1 diabetes mellitus following COVID-19 RNA-based vaccine. *J Diabetes Investig.* 2022.
101. Makiguchi T, Fukushima T, Tanaka H, Taima K, Takayasu S, Tasaka S. Diabetic ketoacidosis shortly after COVID-19 vaccination in a non-small-cell lung cancer patient receiving combination of PD-1 and CTLA-4 inhibitors: A case report. *Thorac Cancer.* 2022;13(8):1220-3.
102. Bleve E, Venditti V, Lenzi A, Morano S, Filardi T. COVID-19 vaccine and autoimmune diabetes in adults: report of two cases. *J Endocrinol Invest.* 2022;45(6):1269-70.
103. Aydoğan B, Ünlütürk U, Cesur M. Type 1 diabetes mellitus following SARS-CoV-2 mRNA vaccination. *Endocrine.* 2022.
104. Sato T, Kodama S, Kaneko K, Imai J, Katagiri H. Type 1 Diabetes Mellitus Associated with Nivolumab after Second SARS-CoV-2 Vaccination, Japan. *Emerg Infect Dis.* 2022;28(7):1518-20.
105. Yakou F, Saburi M, Hirose A, Akaoka H, Hirota Y, Kobayashi T, et al. A Case Series of Ketoacidosis After Coronavirus Disease 2019 Vaccination in Patients With Type 1 Diabetes. *Front Endocrinol (Lausanne).* 2022;13:840580.
106. Ganakumar V, Jethwani P, Roy A, Shukla R, Mittal M, Garg MK. Diabetic ketoacidosis (DKA) in type 1 diabetes mellitus (T1DM) temporally related to COVID-19 vaccination. *Diabetes Metab Syndr.* 2022;16(1):102371.
107. Zilbermint M, Demidowich AP. Severe Diabetic Ketoacidosis After the Second Dose of mRNA-1273 COVID-19 Vaccine. *J Diabetes Sci Technol.* 2022;16(1):248-9.
108. Infante M, Fabbri A, Padilla N, Pacifici F, Di Perna P, Vitiello L, et al. BNT162b2 mRNA COVID-19 Vaccine Does Not Impact the Honeymoon Phase in Type 1 Diabetes: A Case Report. *Vaccines (Basel).* 2022;10(7).
109. Chatzimeletiou K, Fleva A, Sioga A, Georgiou I, Nikolopoulos TT, Markopoulou M, et al. Effects of Different Drug Therapies and COVID-19 mRNA Vaccination on Semen Quality in a Man with Ankylosing Spondylitis: A Case Report. *Medicina (Kaunas).* 2022;58(2).
